# Supplementary material
Source: PubMed Central journal article supplement (PMC6293339)

# Appendix Materials for

## **The I $\kappa$ B kinase complex is a regulator of mRNA stability**

Mikuda, N.\* , Kolesnichenko, M.\* , Beaudette, P., Popp, O., Uyar, B., Sun, W., Tufan, A.B., Perder, B., Akalin, A., Chen, W., Mertins, P., Dittmar, G., Hinz, M., and Scheidereit, C.\*\*

\* equal first authors

\*\* corresponding author, E-mail: [scheidereit@mdc-berlin.de](mailto:scheidereit@mdc-berlin.de)

### **This file includes:**

- Legends to Appendix Figs. S1 to S8
- List of Tables EV1-EV8
- Appendix References
- Appendix Figs. S1 to S8

## LEGENDS TO SUPPLEMENTARY FIGURES

### Figure S1. Genotoxic stress augments EDC4 interaction with IKK $\gamma$ .

**A)** Heatmap of proteins with enhanced binding to IKK $\gamma$  after IR-treatment. U2-OS cells were labelled with heavy and light amino acids. For the forward experiment (fwd), heavy labelled cells were irradiated and harvested 45 min later. Light labelled cells were left untreated. For the reverse experiment, labels were switched. Cytoplasmic extracts (CE) were prepared and IKK $\gamma$  and its interaction partners were immunoprecipitated with an anti-IKK $\gamma$  antibody crosslinked to Dynabeads. IP samples were subjected to MS analysis. Cut-off for increased interaction in irradiated compared to unstimulated cells was set for at least 2-fold change, resulting values for the H/L ratio of at least 2 in the fwd experiment and 0.5 in the reverse experiment (Table EV1). Note that the time point taken after irradiation is later than time frame in which the IKK $\gamma$ -PARP-1-PIASy-ATM interactions can be observed (Stilmann et al, 2009) (and data not shown). Identified targets were scored using two repositories annotating the frequency of detection in co-immunoprecipitation experiments or in negative controls from large scale MS experiments, respectively (<http://www.peptracker.com/pfl> and [www.crapome.org](http://www.crapome.org)). Targets were screened for predicted IKK phosphorylation sites using the dbPTM database (<http://dbptm.mbc.nctu.edu.tw/>). IKK $\gamma$  interacting proteins with documented function in mRNA metabolism are highlighted in yellow. **B)** GO term clusters of interaction partners of IKK $\gamma$  identified in **A)**. **C)** Immunoprecipitation of endogenous IKK $\beta$  or EDC4 with and without RNase-treatment prior to IP (RNaseA /T1 cocktail mix) from unstimulated (ut), irradiated (20 Gy; 45 min post stimulus) or TNF $\alpha$ -treated (10 ng/ml; 15 min) U2-OS cells. WB of EDC4 or IKK $\beta$ . **D)** HEK293 cells bearing a doxycycline-inducible HA-FLAG-tagged DDX6 plasmid were left untreated or pre-treated with dox for 3 days. Dox-treated cells were left unstimulated or were irradiated with 20 Gy and harvested at indicated time points. DDX6 was immunoprecipitated by pull-down of the HA-tag followed by SDS-PAGE western blot of FLAG (DDX6), and IKK $\gamma$ . **E)** U2-OS cells were irradiated (IR; 20 Gy, 45 min) or left unstimulated (ut) and cytoplasmic (CE) and nuclear (NE) extracts were prepared. Cytoplasmic lysates were used for immunoprecipitation of TRAF6 followed by SDS-PAGE western blot of TRAF6, IKK $\gamma$ , and EDC4. **F)** *In vitro* co-immunoprecipitation followed by SDS-PAGE western blot of purified recombinant Strep-tagged EDC4 sub-domains with recombinant GST-tagged full-length IKK $\gamma$  by immunoprecipitation with anti-GST-beads. **G)** EDC4 diagram with WD40 domain, serine-rich linker and  $\alpha$ -helical domain, including summary of interaction of IKK $\gamma$  with EDC4 or EDC4 domains shown in Fig. 1E and Fig. S1F. **H)** IKK $\gamma$  diagram with coiled-coil domains 1 and 2 (CC1, CC2), leucine zipper (LZ) and zinc finger (ZNF) and summary of EDC4-WD40 domain interactions (see Fig. 1F-G).

### Figure S2. IKK phosphorylates EDC4 at S583 in cells

Endogenous EDC4 purified from unstimulated or TNF $\alpha$ -treated (10 ng/ml, 15 min) U2-OS CRISPR cells (15 cm dish per IP) (wildtype control, WT; IKK $\beta$  knockout, IKK-KO; EDC4 knockout; EDC-KO) by immunoprecipitation of EDC4 and subsequently analysed for phosphorylated peptides by LC-MS/MS analysis. **A)** MS2 spectrum of a phosphopeptide, showing endogenous EDC4-phosphorylation on Ser583 from a TNF $\alpha$ -treated sample. Figure exported from MaxQuant Viewer. Coverage of b- and y ions indicated by blue and red colors, respectively (see Table EV3 for MS data). **B)** SDS-PAGE/ western blot probed with antibodies against indicated proteins from input of samples used for MS-IP (see a). **C)** Phospho-site intensities of EDC4 Ser583-P [IVELPAPADFLS(P)LSSETKPK] normalized to overall EDC4 unmodified protein intensities. Intensities reported are precursor signals from the respective phosphopeptides. n.d.: not detectable. **D)** Reported phosphosites of EDC4 (see phosphositeplus.org). Phosphosites of EDC4 identified in this study are indicated.

### Figure S3. Phosphorylation of EDC4 by IKK promotes P-body formation.

**A)** P-body foci visualized by fluorescence microscopy using anti-DDX6 antibody (red) and EDC4 (green) in primary BJ cells left untreated (ut), at 45 minutes (45') or 90 minutes (90') post irradiation (IR = 80 Gy). Nuclei were stained with DAPI (blue). **B)** Visualization of P-body foci in HeLa cells as in **A)** (IR = 10 Gy). **C)** Fluorescence microscopy using anti-EDC4 antibody (red) and anti-IKK $\beta$  antibody (green) in U2-OS cells as in Figure 3 A). **D)** Fluorescence microscopy using anti-EDC4 antibody (red) and anti-IKK $\gamma$  antibody (green) in U2-OS cells as in Figure 3 A). **E-G)** SDS-PAGE/ western blot probed with antibodies against indicated proteins from whole cell lysates of unstimulated U2-OS cells, or cells treated with TNF $\alpha$  (10 ng/ml), IL-1 $\beta$  (10 ng/ml), or H<sub>2</sub>O<sub>2</sub> (100  $\mu$ M) for the indicated times. **H-J)** Visualization of P-body foci of U2-OS cells treated with TNF $\alpha$  (**H**), IL-1 $\beta$  (**I**) and H<sub>2</sub>O<sub>2</sub> (**J**). Cells were stained with antibody against DDX6 (green). Nuclei were visualized with DAPI (blue). **K)** Left: SDS-PAGE/ western blot of clonal U2-OS cells stably expressing pTRIPZ RFP-coupled shIKK $\beta$ . To induce depletion of IKK $\beta$ , cells were treated with doxycycline (IKK<sup>sh</sup>) or left untreated (wt). Cells were harvested 45 or 90 minutes post irradiation. Right, top panel: EMSA of nuclear extracts from U2-OS cells stably expressing pTRIPZ RFP-coupled shIKK $\beta$  treated with doxycycline (IKK<sup>sh</sup>) or left untreated (wt). Cell extracts were prepared 45 or 90 min post irradiation. Lower panel: SDS-PAGE blot probed for PARP-1 as loading control. **L)** P-bodies visualized by fluorescence microscopy using anti-DDX6 antibody (green) and nuclei stained with DAPI (blue) in clonal U2-OS cells stably expressing pTRIPZ RFP-coupled shIKK $\gamma$ . To induce depletion of IKK $\gamma$ , cells were treated with doxycycline (IKK<sup>sh</sup>) or left untreated (IKK $\gamma$  wt). Cells were analysed 45 or 90 min post irradiation. **M)** Top panel: SDS-PAGE

of clonal U2-OS cells stably expressing pTRIPZ RFP-coupled shIKK $\gamma$ , as in **K**). Lower panel: EMSA of nuclear extracts from clonal U2-OS cells stably expressing pTRIPZ RFP-coupled shIKK $\gamma$ , as in **K**. **N**) P-bodies visualized by fluorescence microscopy using anti-DDX6 antibody (green) in U2-OS cells transfected with control siRNA (scr\_si) or siRNA directed against IKK $\gamma$  (IKK $\gamma$ \_si). Analysed cells were untreated or 45 min post irradiation. Nuclei were stained with DAPI (blue). **O**) U2-OS cells were pre-treated with DMSO or IKK inhibitor (BMS345541) and analysed by fluorescence microscopy. Cells were stained with antibodies against p65 (red), DDX6 (green) and nuclei were stained with DAPI (blue). Analysis was performed with untreated cells or 45 min and 90 min post irradiation. Right panel: SDS-PAGE blot of whole cell extracts from U2-OS cells pre-treated with DMSO or IKK inhibitor and analysed 45 min after irradiation. **P**) Visualization of P-bodies in clonal U2-OS cells stably expressing pTRIPZ RFP-coupled shEDC4 as in **L**). **Q**) SDS-PAGE of clonal U2-OS cells stably expressing pTRIPZ RFP-coupled shEDC4, as in **M**). **R**) U2-OS cells were transfected with siRNA against EDC4 (EDC4\_si) or control siRNA (scr\_si) and treated as in **N**). **S**) Visualization of P-bodies in CRISPRV2 ctrl (no guide RNA), EDC4 or IKK $\beta$  U2-OS knockout cells. Cells were left unstimulated (ut), or were irradiated (20 Gy; analysis 45 min post stimulus) or treated with TNF $\alpha$  (10 ng/ml; analysis 45 min post stimulus). Left panel: Cells were stained with antibody against DDX6 (green) and EDC4 (red). Nuclei were visualized with DAPI (blue), scale bar: 20  $\mu$ m. Right panel: Quantification of P-body foci (blind count) from independent experiments (n=3) by ImageJ software, 500 cells per experiment  $\pm$  s.d. unpaired t-test, \*P < 0.05.

**Figure S4. Significant formation of stress granules is only induced by hydrogen peroxide.**

**A**) Visualization of P-body foci and of stress granules in U2-OS cells treated with IR (20 Gy), TNF $\alpha$  (10 ng/ml), IL-1 $\beta$  (10 ng/ml), or H<sub>2</sub>O<sub>2</sub> (100  $\mu$ M) for indicated times by fluorescence microscopy. P-body foci were visualized using anti-EDC4 antibody (red), formation of stress granules was analysed using anti-G3BP1 antibody (green). Nuclei were stained with DAPI (blue). **B**) Enlarged sections of immunofluorescence images from cells 180 min post stimulus from **A**). White arrow: P-body; red arrow: stress granule.

**Figure S5. EDC4 and IKK regulate basal and DNA damage-induced stability of multiple transcripts.**

**A)** Graph illustrating mRNAs showing increased (green) or decreased (red) expression in irradiated U2-OS cells (20 Gy, 1h) relative to unstimulated cells. mRNA expression was measured by RNA-Seq, significance was calculated for two corresponding conditions and cut-off set for p-value < 0.1 and fold change > 2 (Table EV5A) **B)** Graph illustrating mRNAs showing increased (green) or decreased (red) stability in irradiated cells relative to unstimulated cells. mRNA expression was measured by RNA-Seq, significance was calculated for 2 corresponding conditions and cut-off set for p-value < 0.1 and fold change > 1.5 (Table EV5B). **C)** Visualization of GO terms of transcripts showing altered expression in irradiated cells relative to unstimulated cells (as in Figure 4 F) (Table EV4D). **D)** Visualization of GO terms of transcripts showing altered stability in irradiated cells relative to unstimulated cells using REVIGO (as in Fig. 4F) (Table EV5C). **E)** Visualization of GO terms of transcripts showing increased expression in IKK- or EDC4-depleted cells using REVIGO (Supek et al, 2011) (as in Fig. 4F) (Table EV4G). **F)** Visualization of GO terms of transcripts showing decreased expression in IKK- or EDC4-depleted cells (as in Fig. 4F) (Table EV4H).

**Figure S6. Phosphorylation of EDC4 by IKK regulates stability of IL-8 mRNA. A)** Analysis of stability of IL-8 mRNA by actinomycin chase assay. U2-OS cells were left untreated or irradiated (20 Gy). 30 or 60 min post-IR, cells were treated with actinomycin D (ActD; 10 mg/ml) to inhibit transcription and harvested at indicated time points. Residual mRNA expression following ActD treatment was assessed by qRT-PCR. Left: Relative normalized expression is calculated with reference to two controls (Rpl13a and HPRT1) and untreated, unstimulated control is set to 1. Right: Residual mRNA expression after actinomycin D treatment given as percentage of respective untreated sample. Quantification is representative for independent experiments (n>3);  $\pm$  s.d. unpaired t-test, \*P < 0.01. **B)** qRT-PCR analysis of IL-8 exon-exon (mature mRNA) (top left panel) and IL-8 exon-intron (nascent pre-mRNA) (top right panel) RNA from U2-OS cells stimulated by IR, and 60 min later treated with actinomycin D for 120 min (ActD; 10 mg/ml) to inhibit transcription. Relative normalized expression is calculated with reference to two controls (Rpl13a and HPRT1) and untreated, unstimulated control is set to 1. cDNA was transcribed in presence of reverse transcriptase (+RT) or without addition of reverse transcriptase (-RT). Quantification is representative for independent experiments (n>3);  $\pm$  s.d. unpaired t-test, \*P < 0.01. **C)** Quantitative RT-PCR analysis of IL-8 mRNA from primary BJ cells stimulated by IR (80 Gy), and after 60 min treated with actinomycin D for 0, 60 and 120 min (ActD; 10 mg/ml). Relative normalized expression is calculated with reference to two controls (Rpl13a and HPRT1) and untreated, unstimulated control is set to 1. Quantification is representative for independent

experiments ( $n > 3$ );  $\pm$  s.d. unpaired t-test,  $*P < 0.01$ . **D**) qRT-PCR analysis of IL-8 mRNA from HepG2 cells treated as in **C**) (IR = 40 Gy). **E**) qRT-PCR analysis of IL-8 mRNA from HeLa cells treated as in **B**) (IR = 10 Gy). **F**) Left panel: qRT-PCR analysis of IL-8 mRNA from U2-OS cells stimulated for 30 or 60 min with TNF $\alpha$  (10 ng/ml), and subsequently treated with actinomycin D for 0, 60 or 120 min (ActD; 10 mg/ml). Relative normalized expression is calculated relative to Rpl13a and HPRT1 as references and untreated, unstimulated control is set to 1. Right panel: Residual mRNA expression after actinomycin D treatment given in percent of respective untreated sample. Quantification is representative for independent experiments ( $n > 3$ );  $\pm$  s.d. unpaired t-test,  $*P < 0.01$ . **G**) qRT-PCR analysis of IL-8 mRNA from U2-OS cells stimulated for 60 min with IL-1 $\beta$  (10 ng/ml) or H<sub>2</sub>O<sub>2</sub> (100  $\mu$ M) and subsequently treated with actinomycin D for 0, 30, 60 or 120 min (ActD; 10 mg/ml). Relative normalized expression is calculated as above. Quantification is representative for independent experiments ( $n > 3$ );  $\pm$  s.d. unpaired t-test,  $*P < 0.01$ . **H**) qRT-PCR of IL-8 mRNA from clonal U2-OS cells stably expressing a doxycycline-inducible shIKK $\beta$  left untreated or treated with doxycycline to induce IKK $\beta$  depletion. Cells were irradiated and after 60 min treated with ActD for 0, 30, 60 or for 120 min prior to harvest. Relative normalized expression is calculated with reference to two controls (Rpl13a and HPRT1). Residual mRNA expression after actinomycin D treatment given as percentage of respective untreated sample. Quantification is representative for independent experiments ( $n > 3$ );  $\pm$  s.d. unpaired t-test,  $*P < 0.01$ , ns not significant. **I**) Same as in **H**) with monoclonal U2-OS cells stably expressing a doxycycline-inducible shEDC4 plasmid. **J**) Quantitative RT-PCR of IL-8 (top panel) mRNA from EDC4 knockdown cells transiently reconstituted with shRNA-resistant wildtype EDC4 or phosphorylation-deficient EDC4 mutant (SA);  $\pm$  s.d. unpaired t-test,  $*P < 0.01$ , ns not significant.

**Figure S7. IKK/EDC4 regulates mRNA stability of both NF- $\kappa$ B-dependent and -independent transcripts.** **A**) qRT-PCR of JunB (top, left panel), BAMBI (top, middle panel), I $\kappa$ B $\alpha$  (top, right panel) and IL-8 (bottom, left panel) mRNA from clonal U2-OS cells stably expressing a doxycycline-inducible shIKK $\beta$  left untreated (wt ut – blue, wt IR - green) or treated with doxycycline to induce IKK $\beta$  depletion (IKK $\beta$ <sup>sh</sup> ut – red, IKK $\beta$ <sup>sh</sup> IR - orange). Cells were irradiated and after 60 min treated with ActD for 0, 30, 60 or for 120 min prior to harvest. Relative normalized expression is calculated with reference to two controls (Rpl13a and HPRT1) and mRNA expression levels at 0 min ActD are set to 100 %. Bottom, right panel: comparison of fold change in residual mRNA expression 120 min after ActD treatment. Quantification is representative for independent experiments ( $n > 3$ );  $\pm$  s.d. unpaired t-test,  $*P < 0.01$ . **B**) Same as in **A**) with monoclonal U2-OS cells stably expressing a doxycycline-inducible shEDC4 plasmid. **C**) Quantitative RT-PCR of IL-8, BAMBI, DUSP1, JunB and NFKBIA mRNA from CRISPR control (CRISPRv2) or EDC4 knockout cells transiently reconstituted with wildtype EDC4, phosphorylation-deficient EDC4 mutant (SA) or empty vector as control (ctrl). Cells were left

unstimulated (solid line) or irradiated (stippled line) and after 60 min treated with ActD for 0, 60 or for 120 min prior to harvest. Statistical significance determined by unpaired t-test, \*P < 0.05, ns not significant. **D**) Quantitative RT-PCR of IL-8, BAMBI, NFKBIA, JunB and DUSP1 mRNA of clonal U2-OS cells stably expressing a doxycycline-inducible shIKK $\beta$  left untreated (wt ut – blue, wt TNF $\alpha$  - green) or treated with doxycycline to induce IKK $\beta$  depletion (IKK $\beta$ <sup>sh</sup> ut – red, IKK $\beta$ <sup>sh</sup> TNF $\alpha$  - orange). Cells were left unstimulated or treated with TNF $\alpha$  (10 ng/ml) and after 30 min treated with ActD for 0, 60 or for 120 min prior to harvest. Relative normalized expression is calculated with reference to two controls (Rpl13a and HPRT1). Displayed are fold changes in residual mRNA expression 60 and 120 min after ActD treatment. Quantification is representative for independent experiments (n=2);  $\pm$  s.d. unpaired t-test, \*P < 0.05. **E**) U2-OS cells were transfected with siRNA against EDC4 (EDC4\_si), IKK $\beta$  (IKK\_si), both (EDC4/IKK\_si) or control siRNA (scr\_si). Cells were left unstimulated (ut) or irradiated (20 Gy) and after 60 min treated with ActD for 0, 60 or for 120 min prior to harvest. Relative normalized expression is calculated with reference to two controls (Rpl13a and HPRT1). Displayed are fold changes in residual mRNA expression 60 and 120 min after ActD treatment. Quantification is representative for independent experiments (n=2);  $\pm$  s.d. unpaired t-test, \*P < 0.05.

**Figure S8. Regulation of ARE-containing transcripts via IKK-EDC4 axis and contribution of p38, JNK and MEK1/2 kinases to mRNA regulation following DNA damage.** **A**) RT-PCR of firefly reporter mRNA from wt, EDC4- or IKK-KO cells transiently expressing pEZX-MT01 ARE reporter constructs bearing 0, 5 or 7 repeats of the ARE motif. Relative normalized expression is calculated with reference to intrinsic control (Renilla)  $\pm$  s.d. unpaired t-test, \*P < 0.05, ns not significant. **B**) U2-OS cells were pre-treated with DMSO or p38 (SB203580), JNK (SP600125) or MEK1/2 (PD0325901) inhibitor and whole cell extracts (WCE) were prepared from unstimulated and irradiated cells (20 Gy, 60 min). WCE were analysed by SDS-PAGE using antibodies against phosphorylated and total protein of the kinases and their substrates (cJun – JNK substrate, Hsp27 – p38 substrate, ERK1/2 – MEK1/2 substrate) to show the DNA damage-induced activation of the kinases and the efficiency of their inhibitors. **C**) qRT-PCR of IL-8 (top row), BAMBI (middle row) and TNFAIP3 (bottom row) mRNA from U2-OS cells pre-treated with p38, JNK or MEK1/2 inhibitor or DMSO. Pre-treated cells were irradiated and after 60 min treated with ActD for 0, 60 or for 120 min prior to harvest. Relative normalized expression is calculated with reference to two controls (Rpl13a and HPRT1) and mRNA expression levels at 0 min ActD are set to 100 %. Quantification is representative for independent experiments (n>3);  $\pm$  s.d. unpaired t-test, \*P < 0.01.

## **LIST OF SUPPLEMENTARY TABLES**

Table EV1: **Induced Interaction partners of IKK $\gamma$  in response to DNA damage**

Table EV2: **IKK phosphosites in recombinant EDC4 domains**

Table EV3: **IKK phosphosites in endogenous EDC4**

Table EV4: **IKK $\beta$ - and EDC4- regulated expression and stability of mRNAs in unstimulated and irradiated cells, gene lists and GO terms**

Table EV5: **Effect of irradiation on mRNA expression and stability, gene lists and GO terms**

Table EV6: **NF- $\kappa$ B target genes regulated post-transcriptionally by IKK and/or EDC4**

Table EV7: **Enrichment of ARE motifs in IKK- and EDC4-regulated targets**

Table EV8: **ARE-containing transcripts regulated by IKK and EDC4**



## APPENDIX REFERENCES

Stilmann M, Hinz M, Arslan SC, Zimmer A, Schreiber V, Scheidereit C (2009) A nuclear poly(ADP-ribose)-dependent signalosome confers DNA damage-induced I $\kappa$ B kinase activation. *Mol Cell* **36**: 365-378

Supek F, Bosnjak M, Skunca N, Smuc T (2011) REVIGO summarizes and visualizes long lists of gene ontology terms. *PLoS One* **6**: e21800

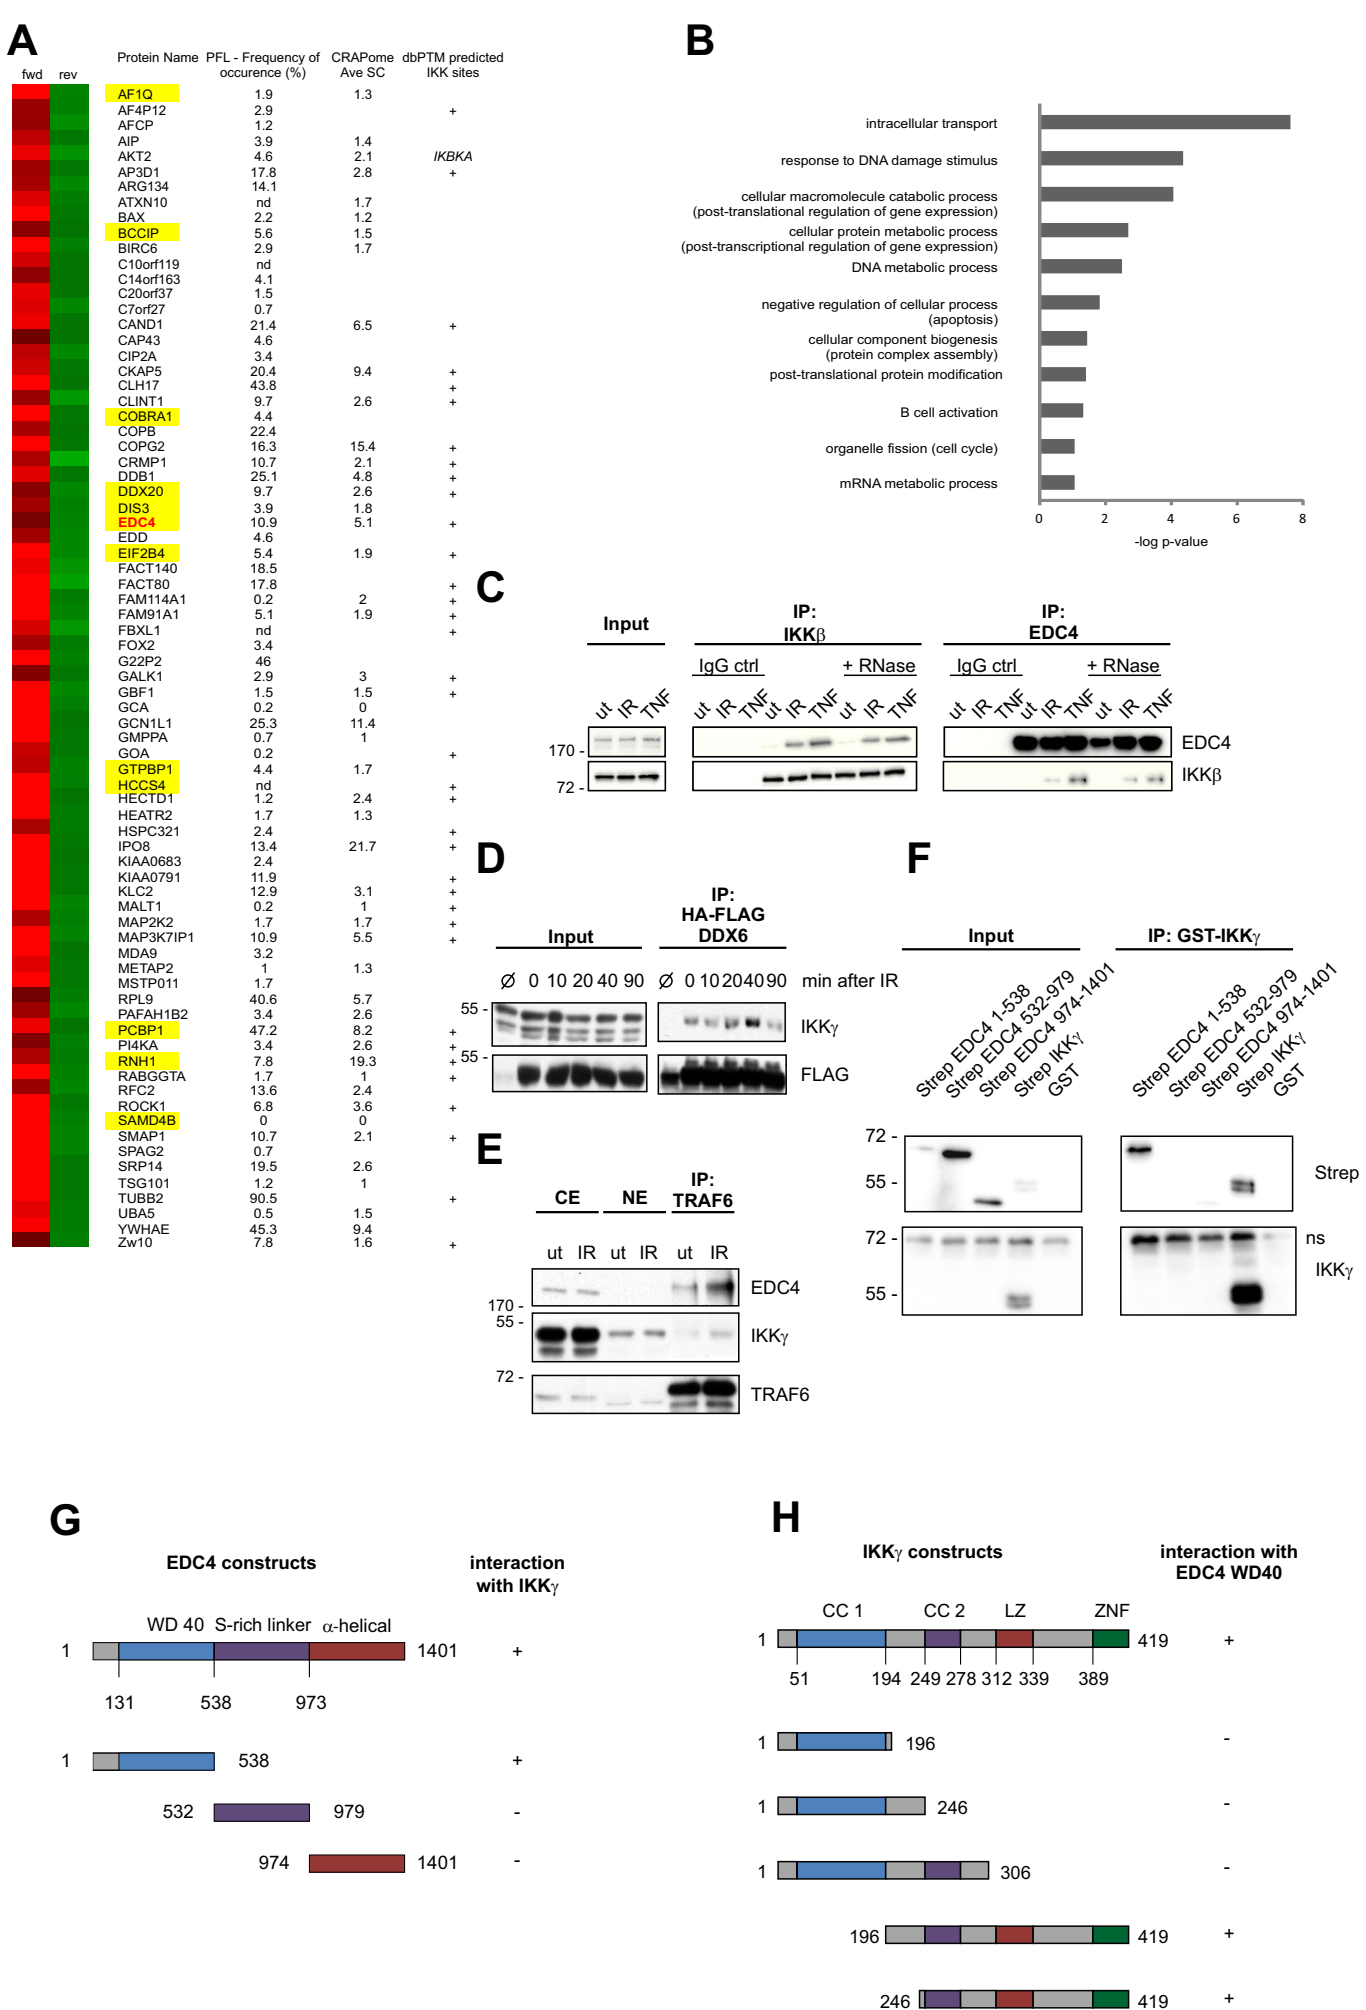

**A**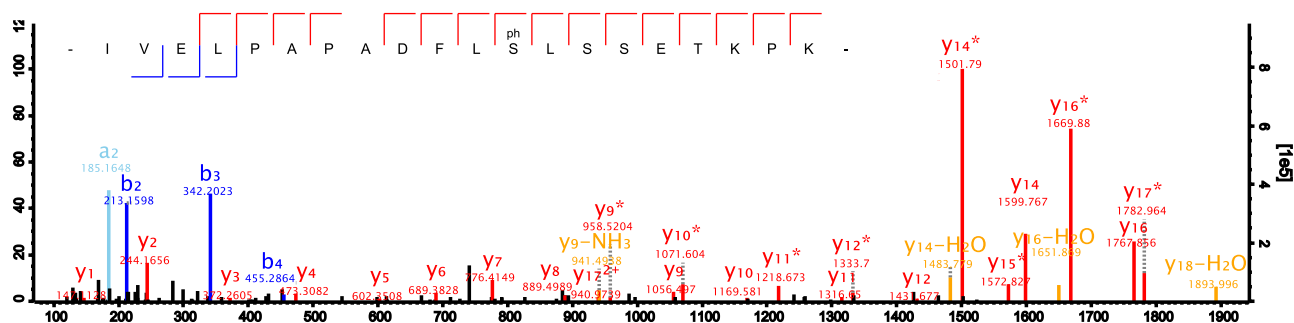**B**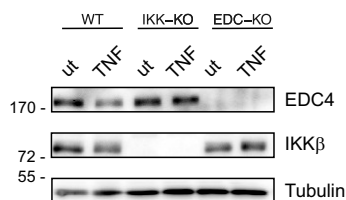**C**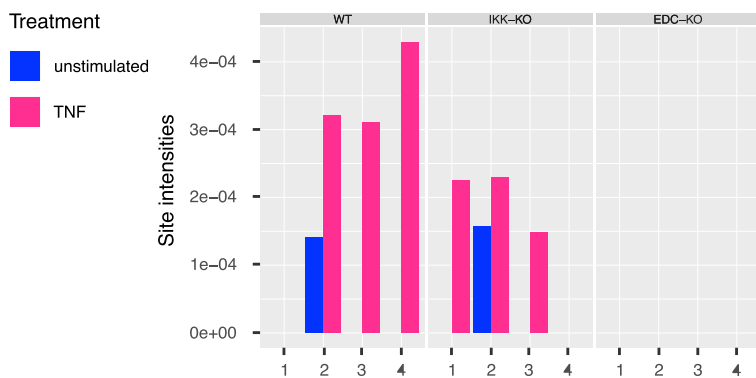**D**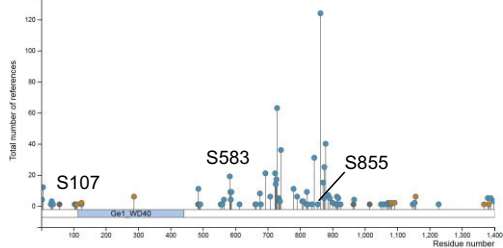

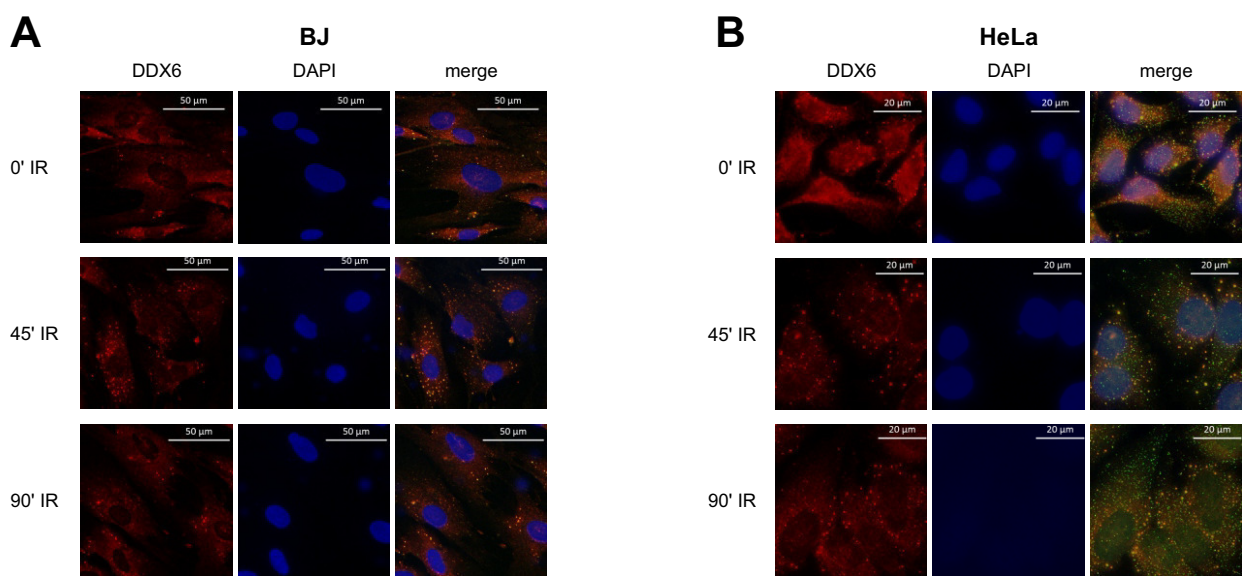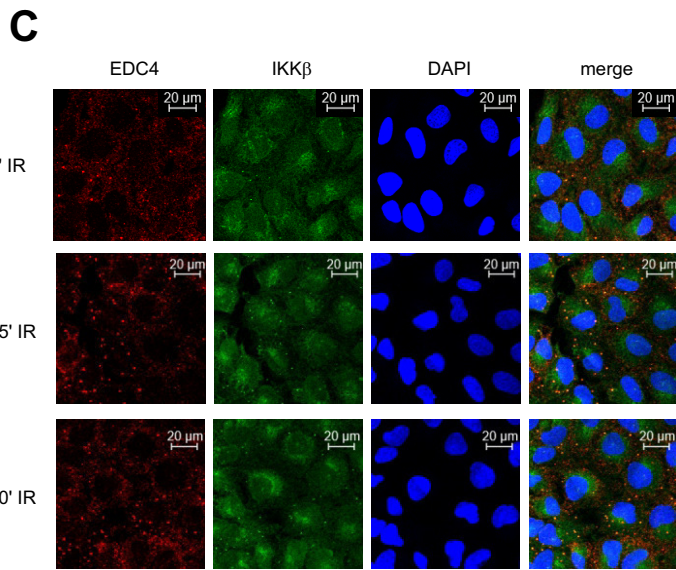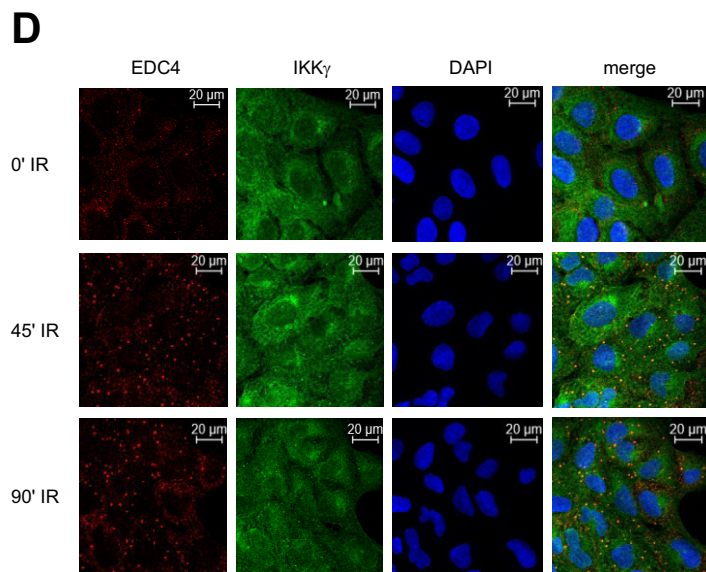

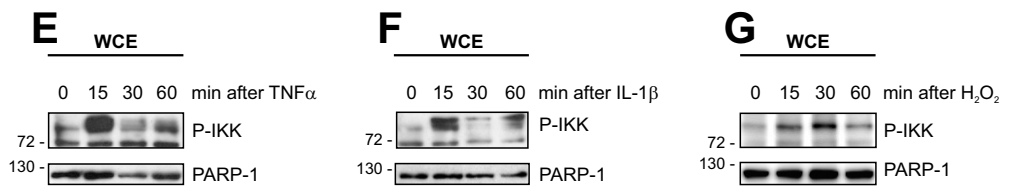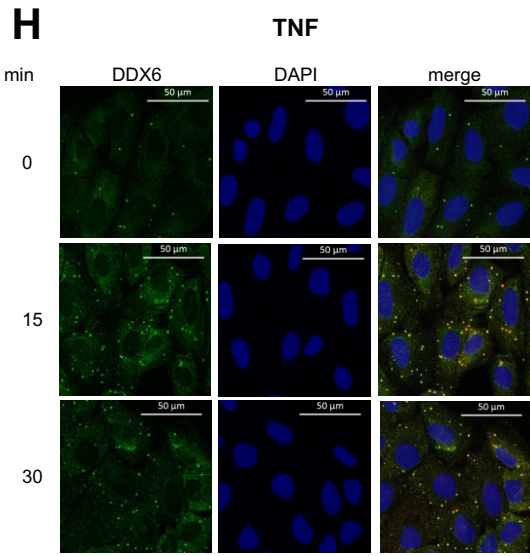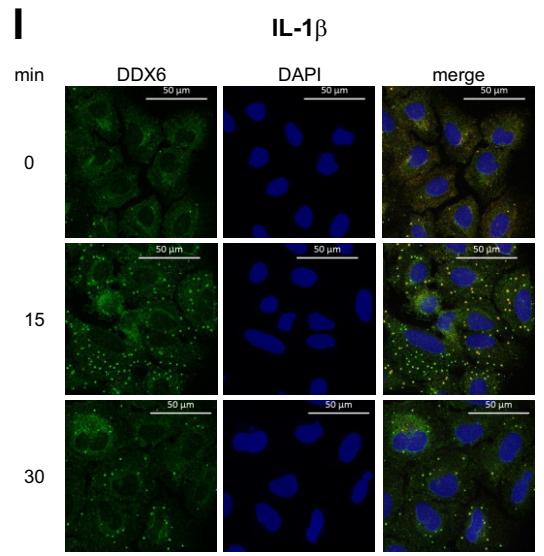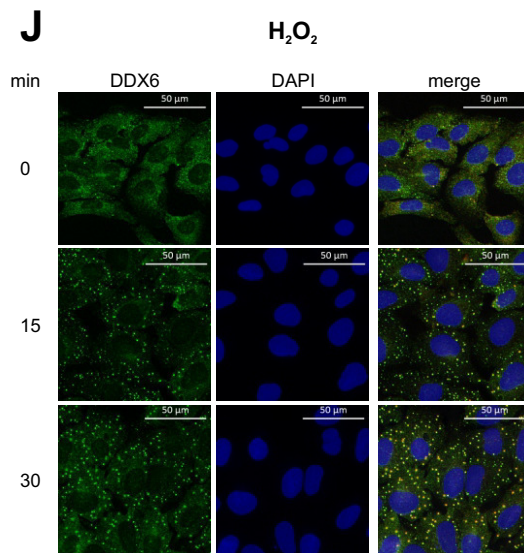

**K**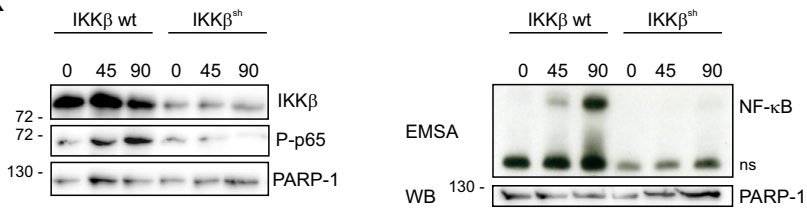**L**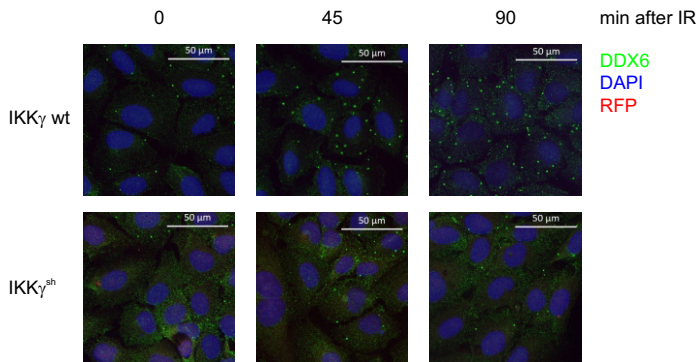**M**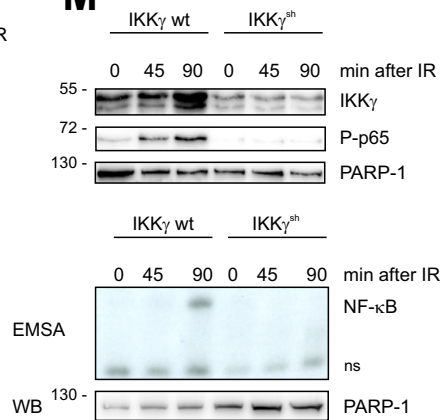**N**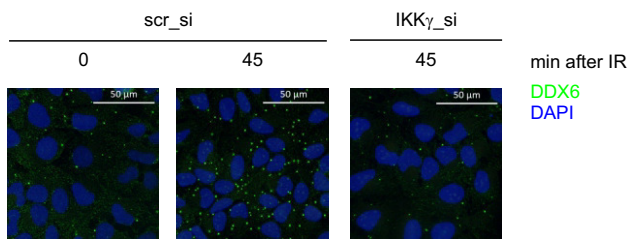**O**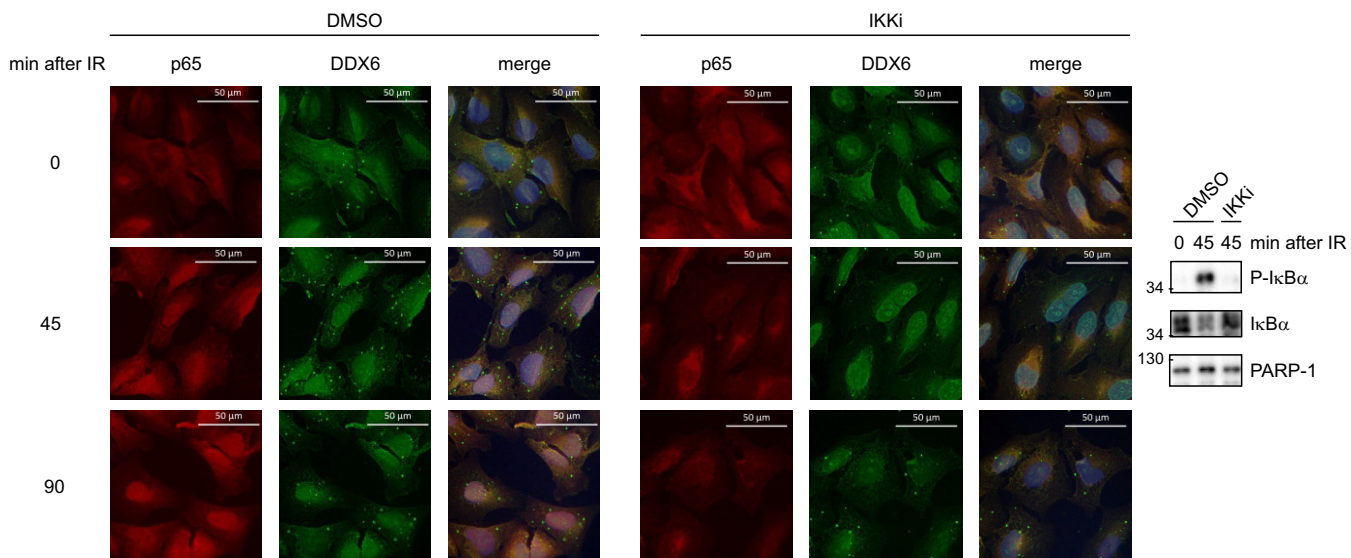

**P**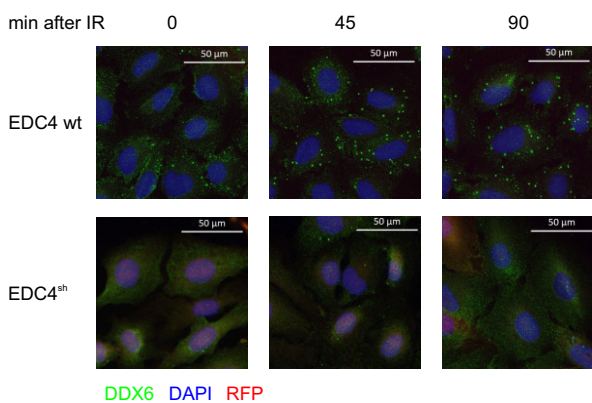**Q**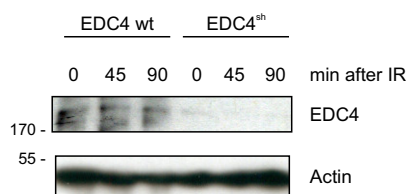**R**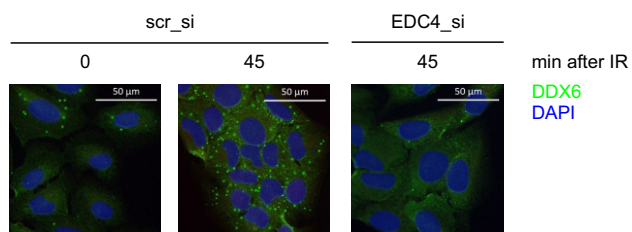**S**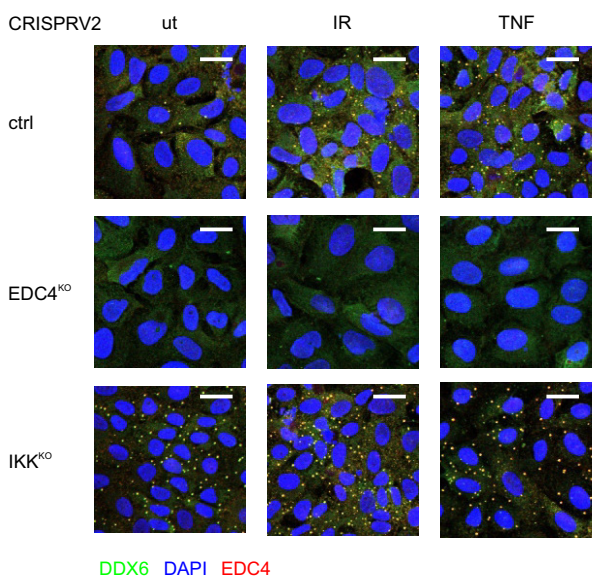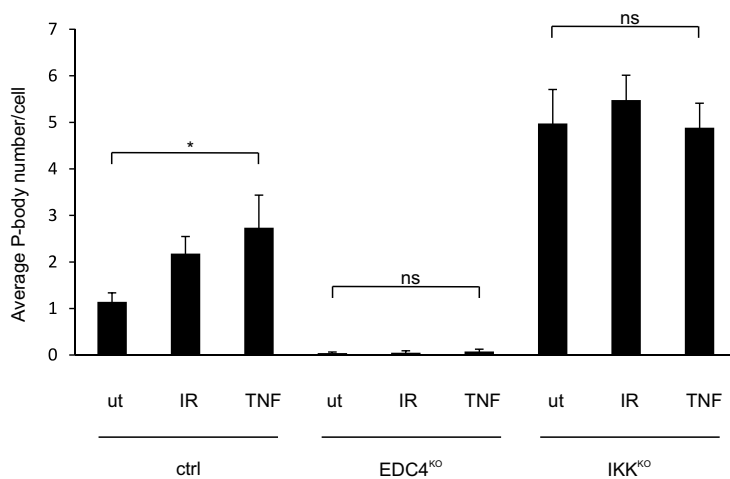

**A****IR**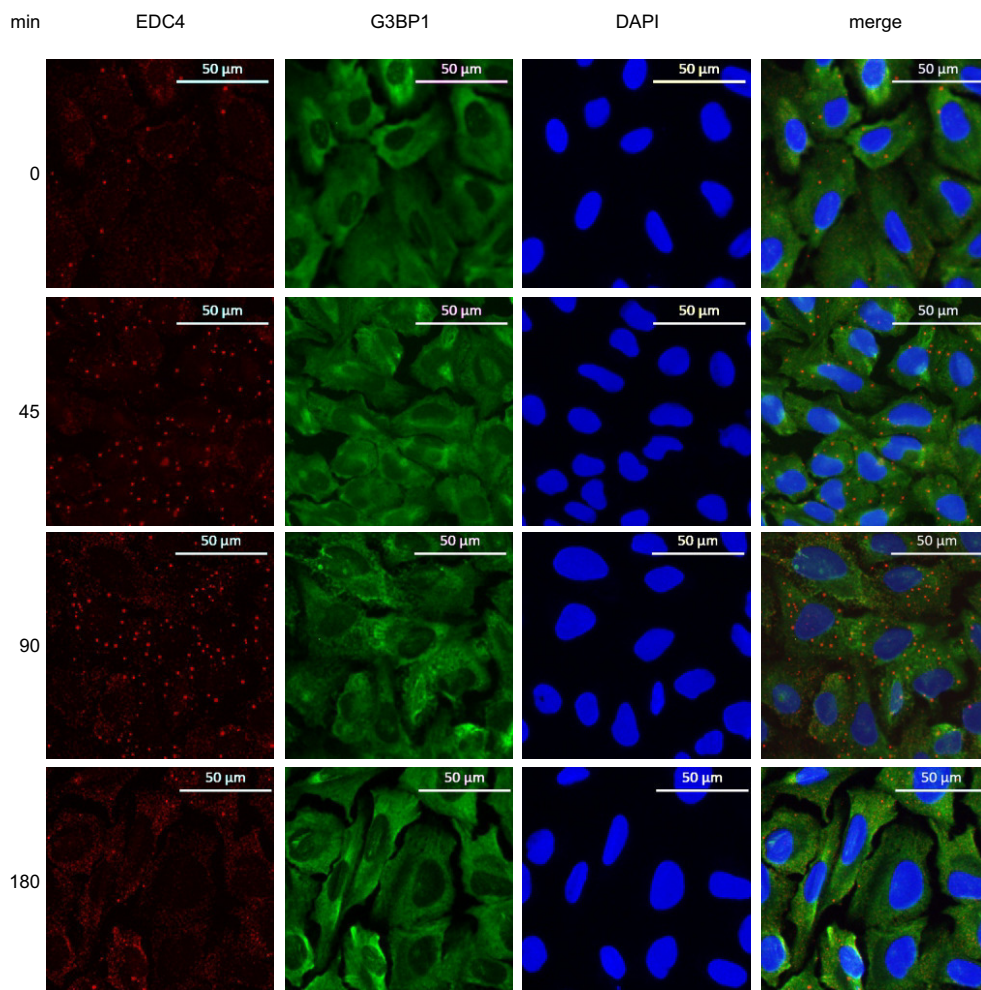**TNF**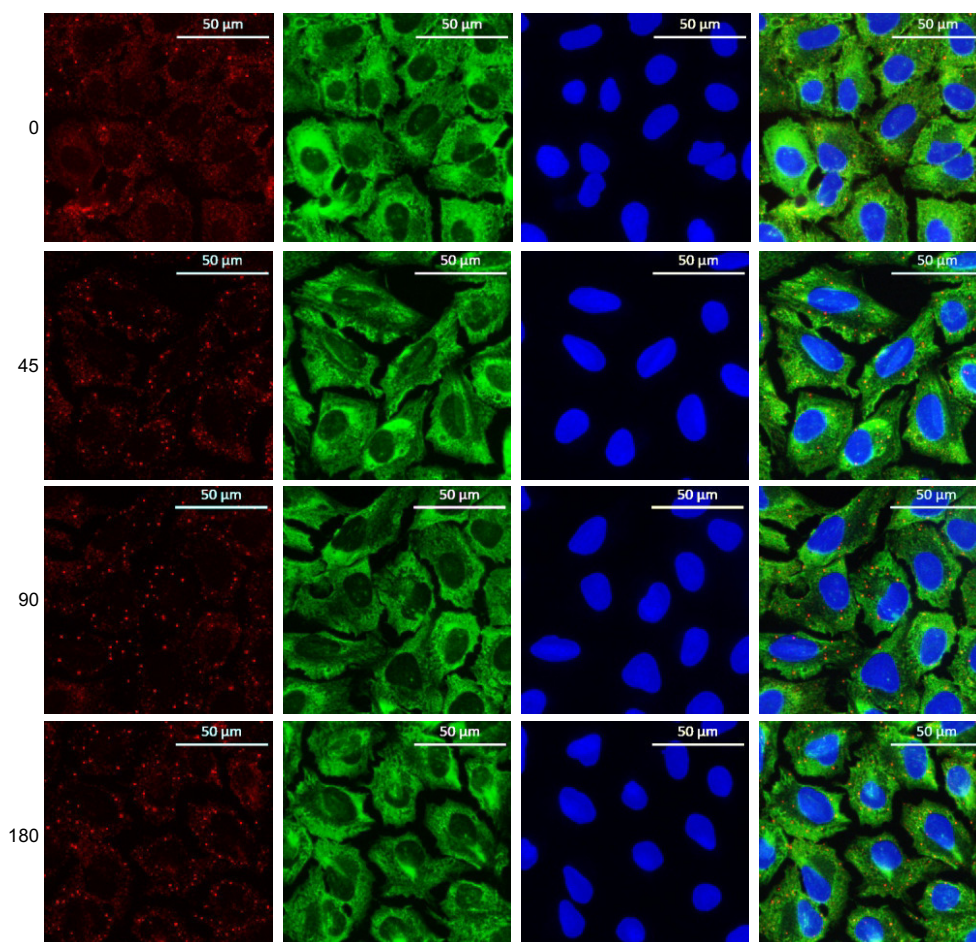



# Appendix Figure S4A continued

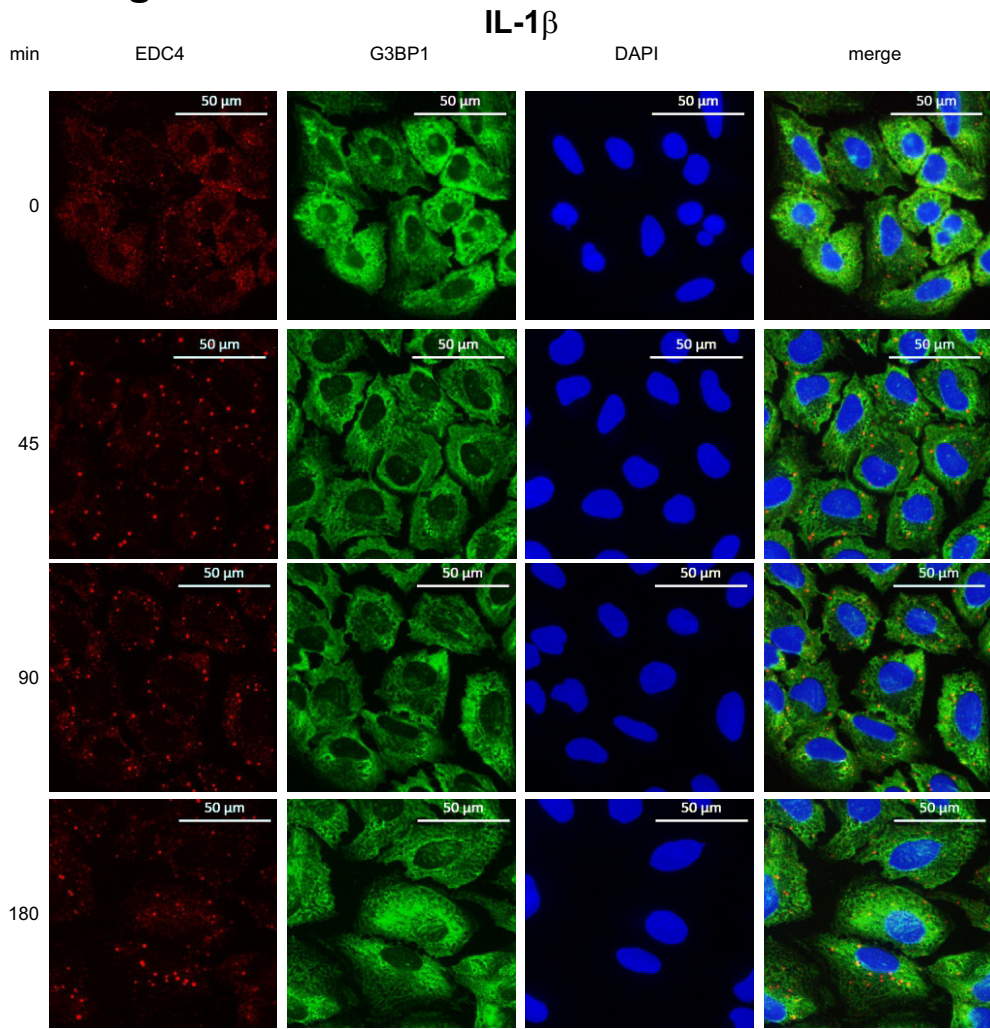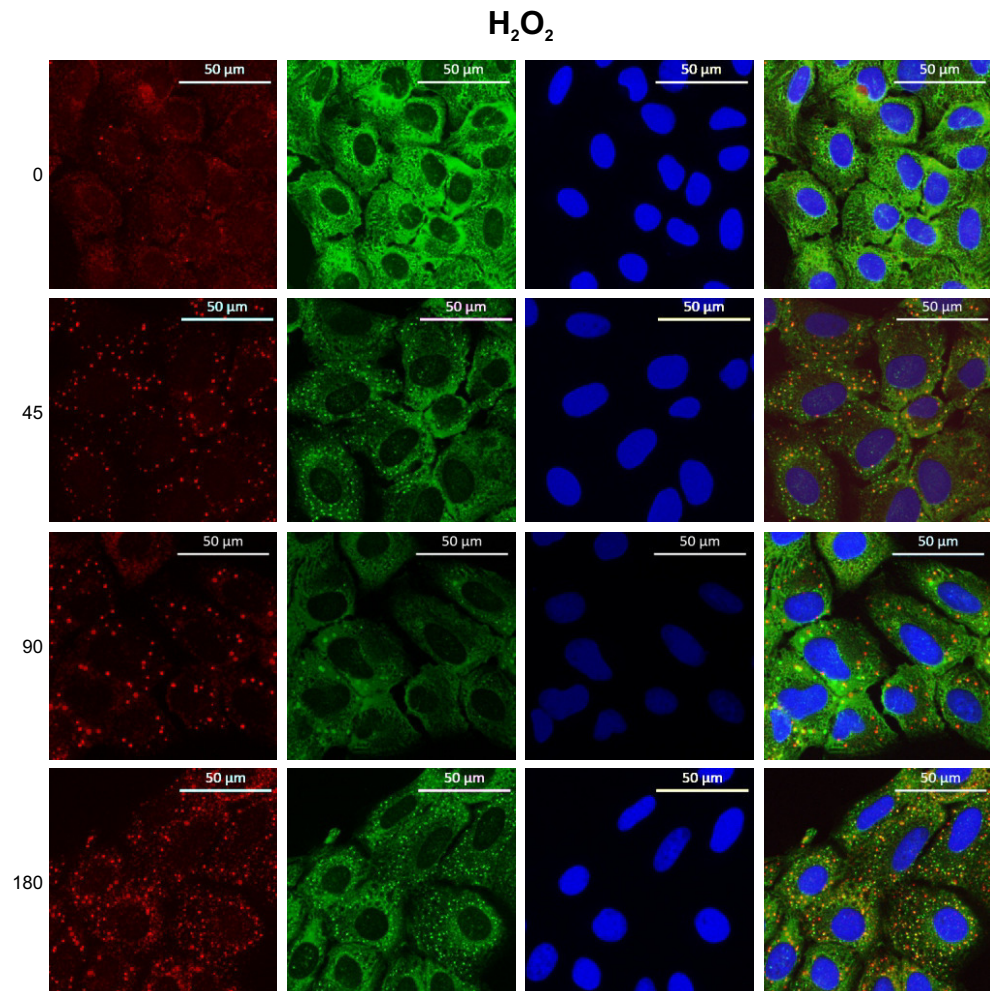

**B**

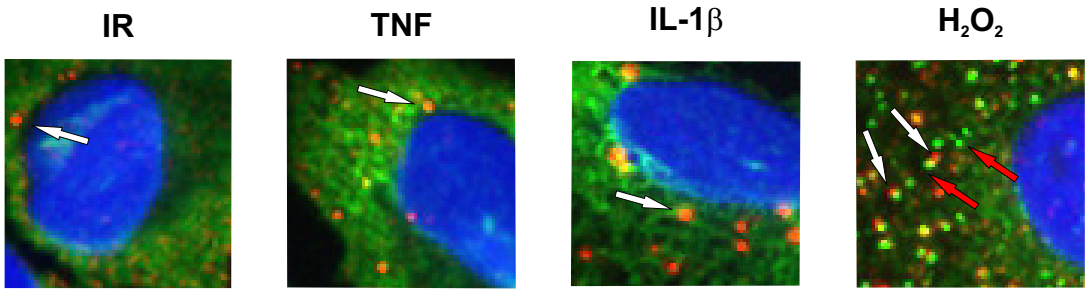

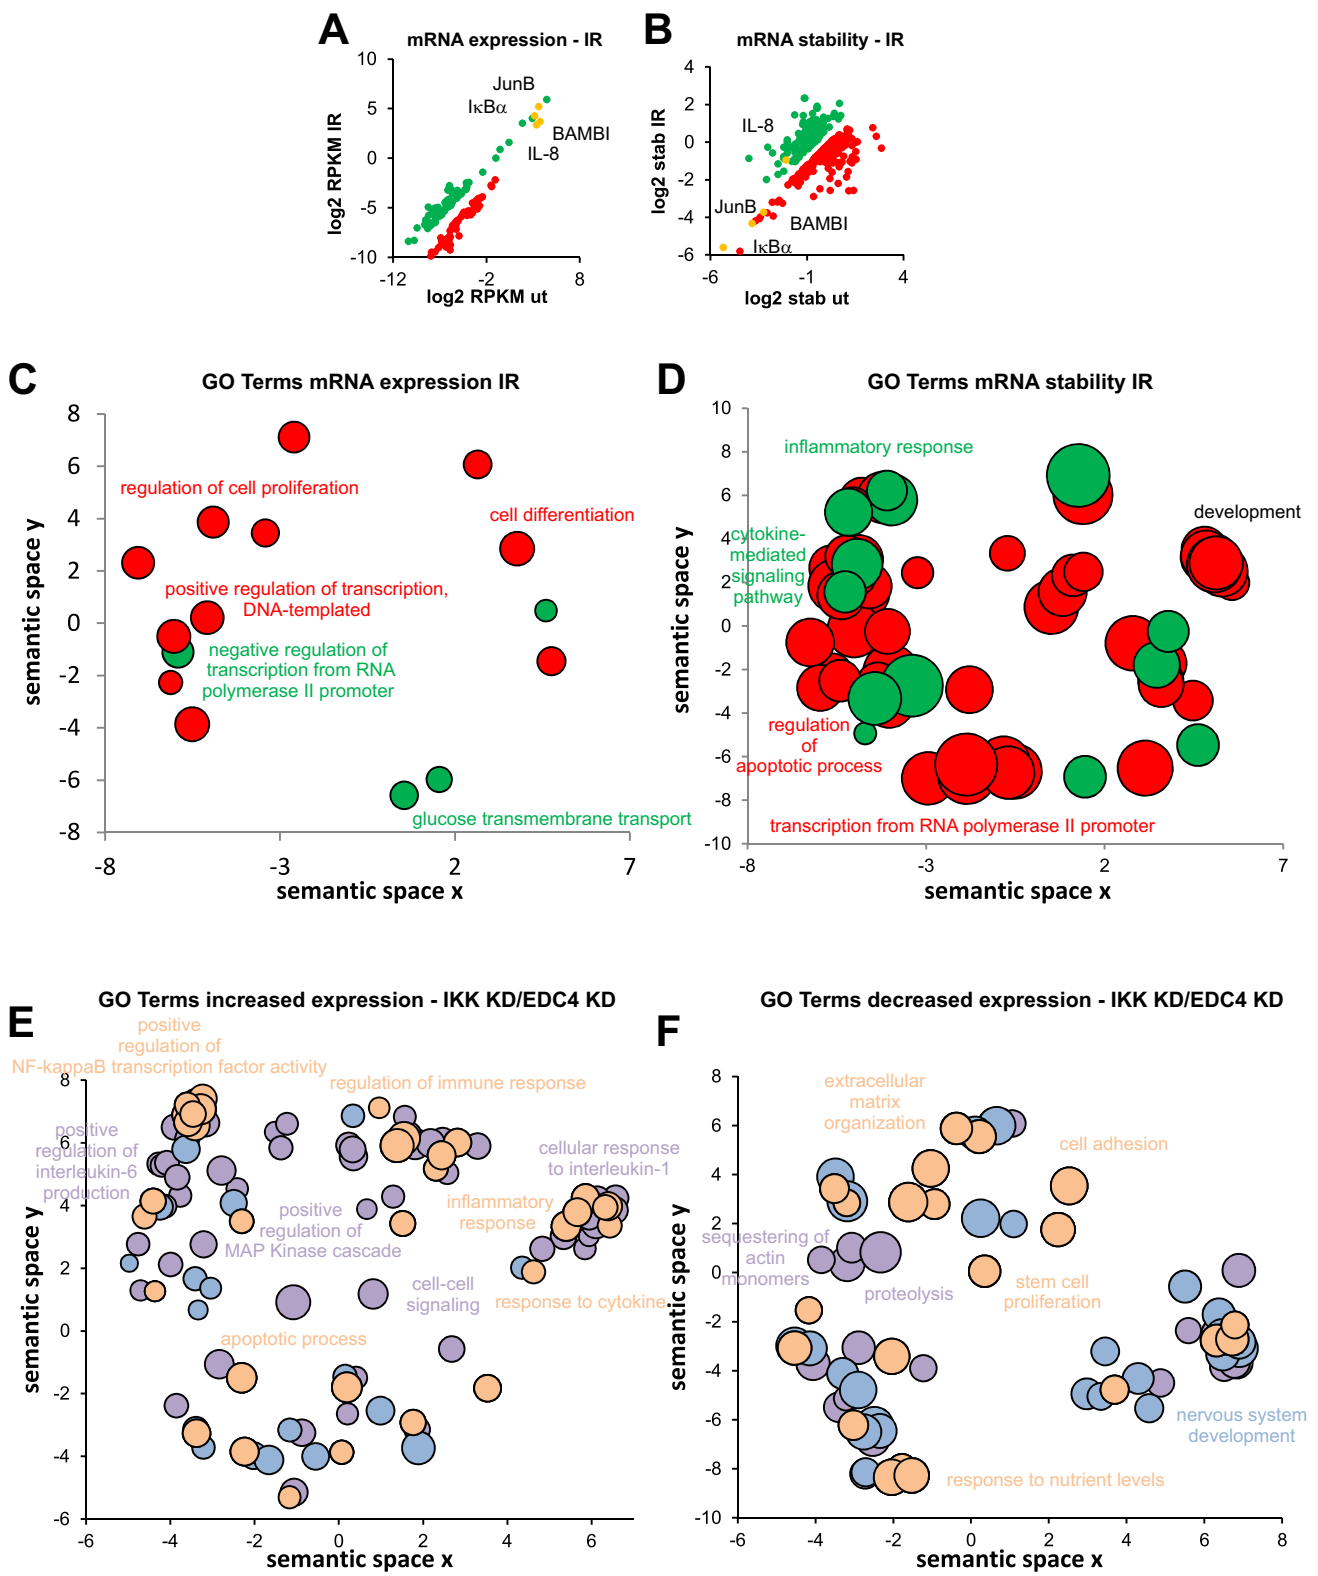

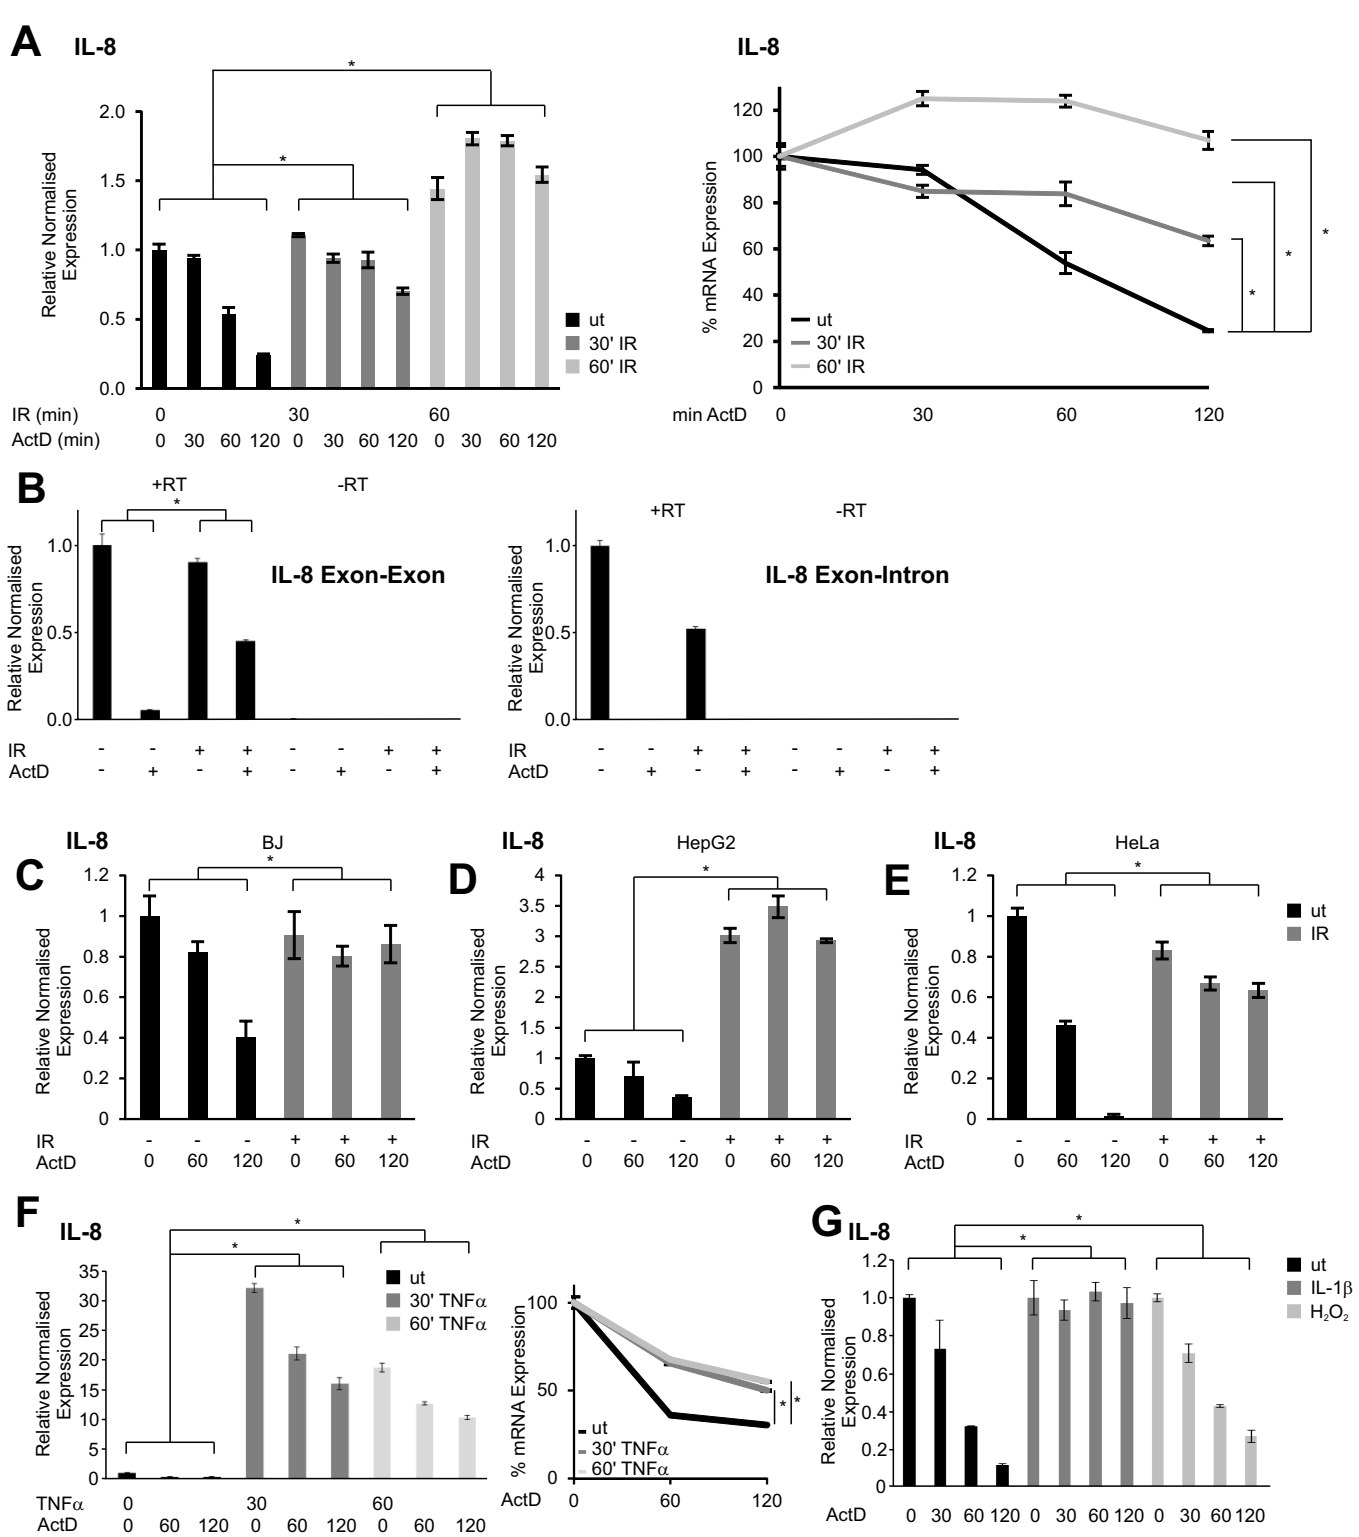

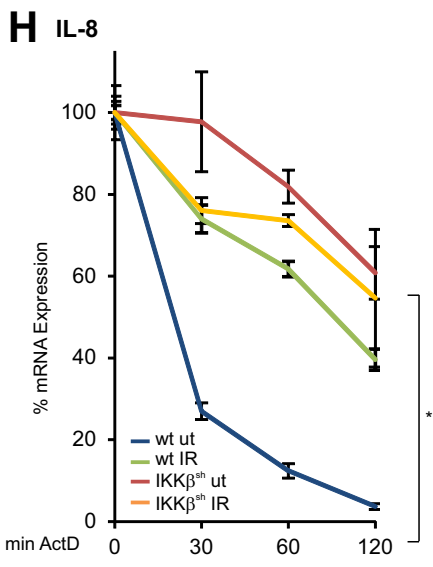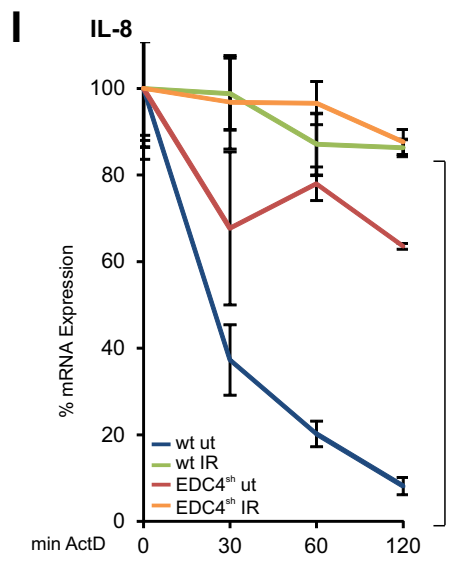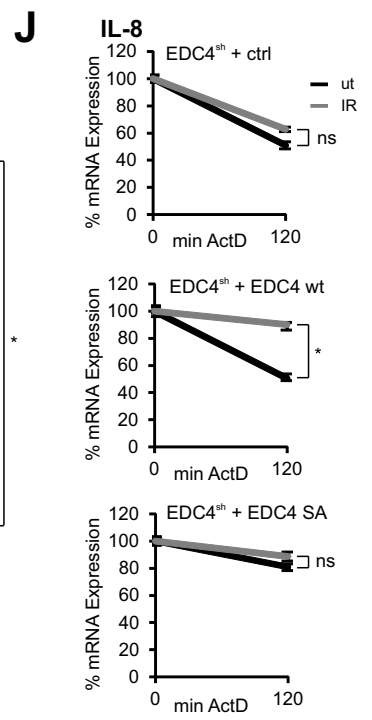

**A**NF- $\kappa$ B and  
IKK/EDC4 target

IKK/EDC4 target

NF- $\kappa$ B target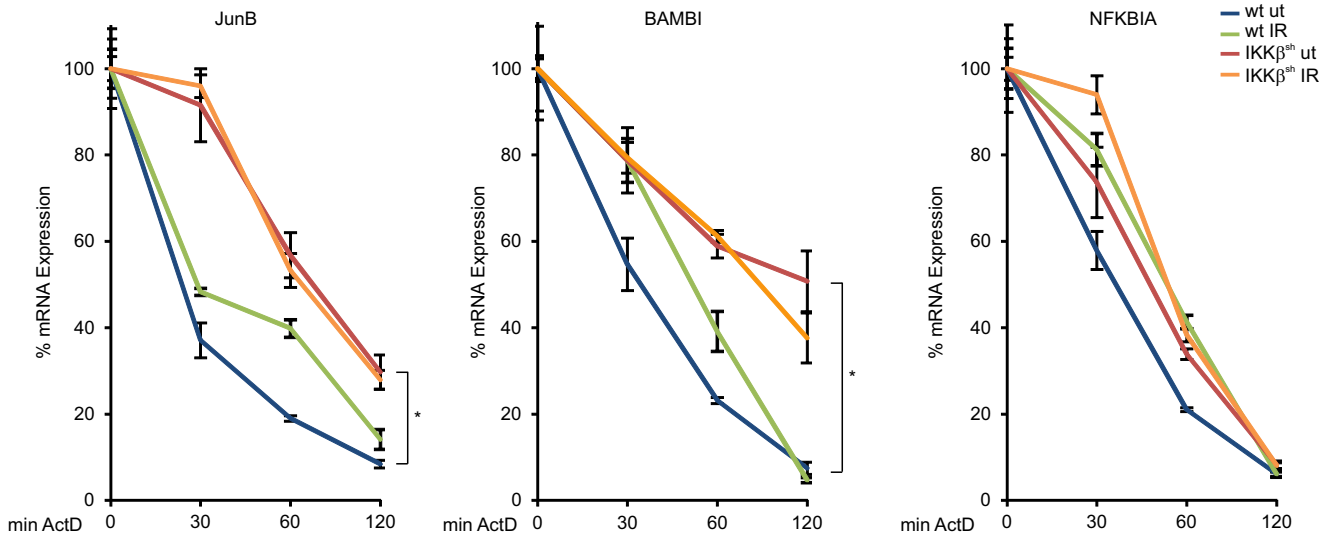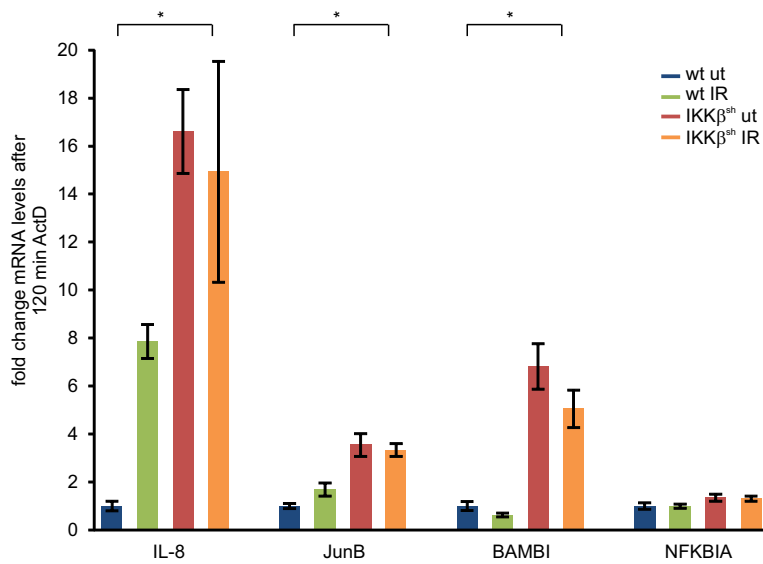

**B**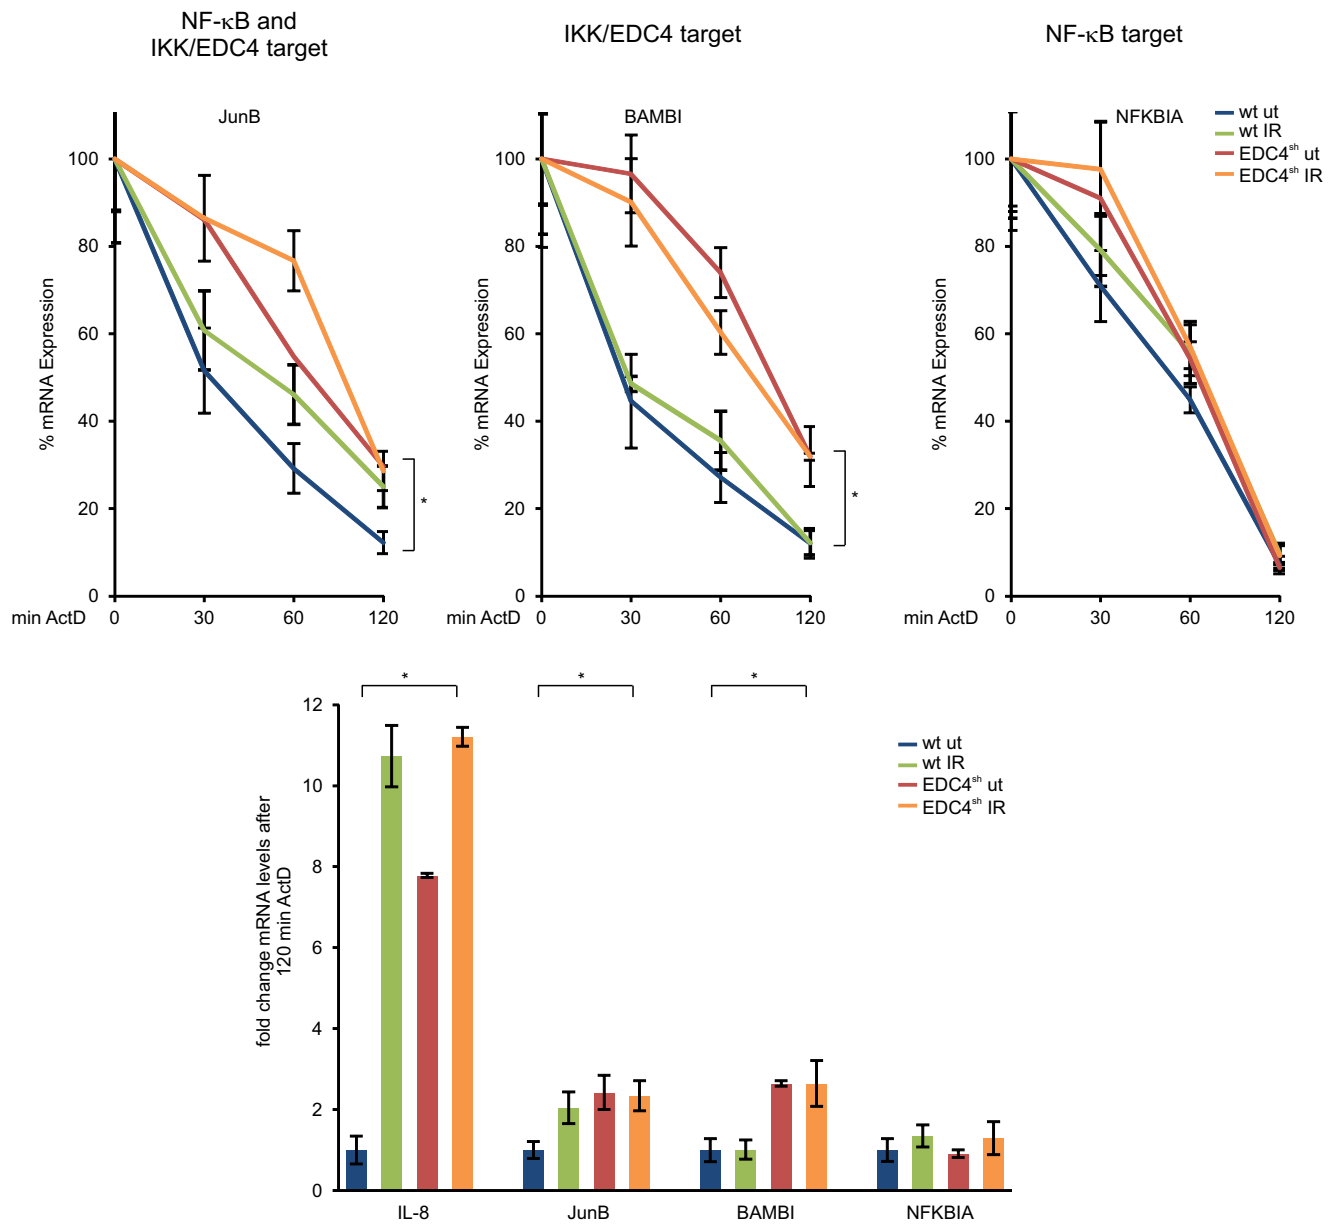

**C**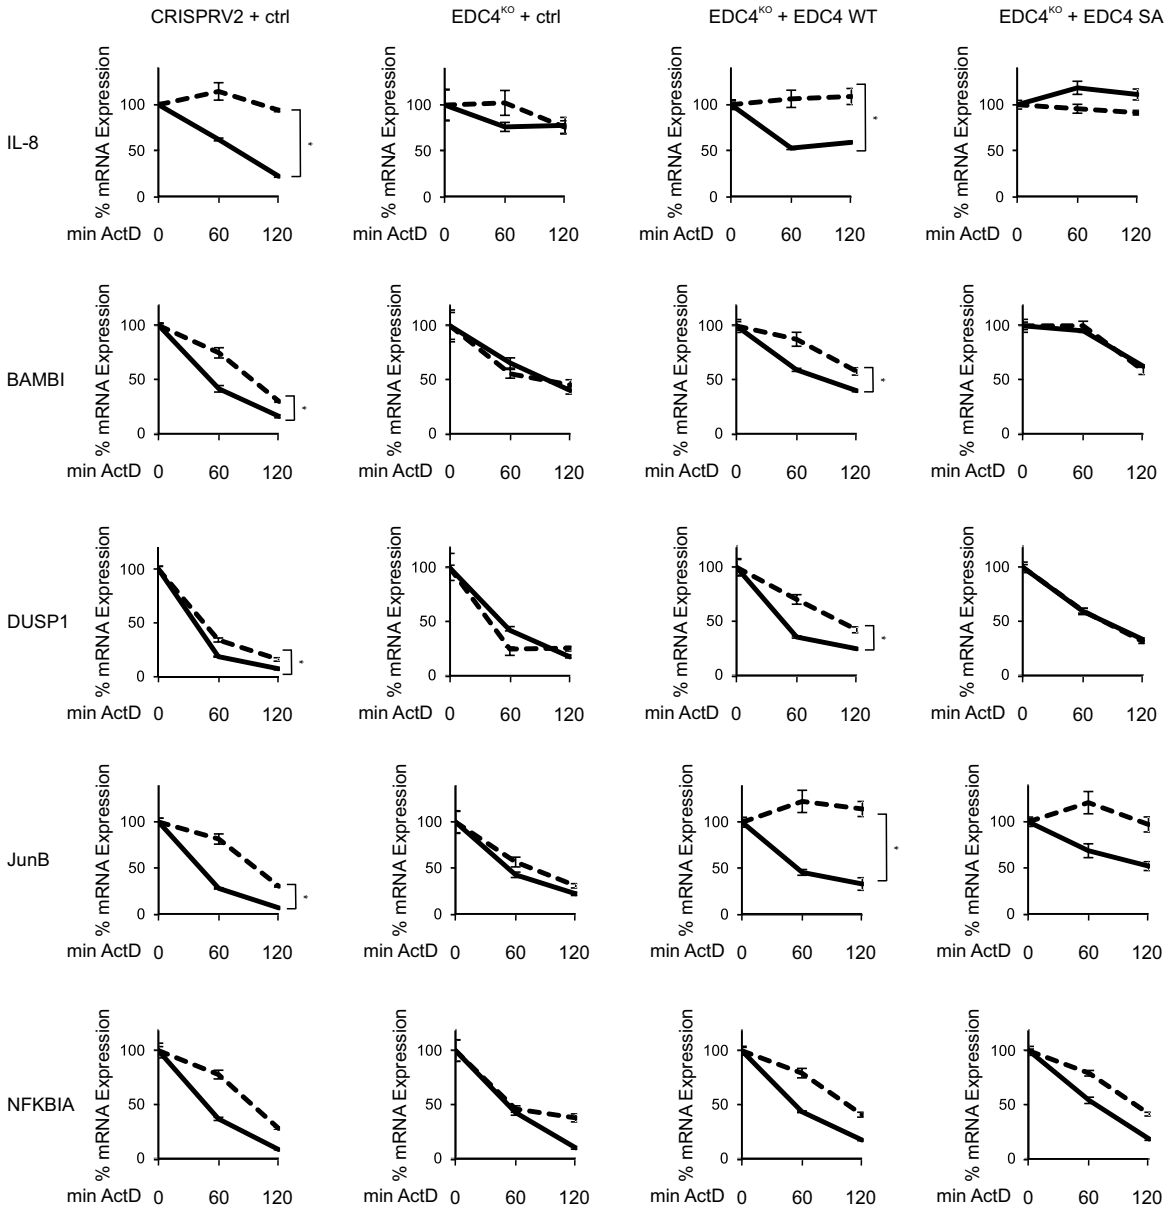



**D**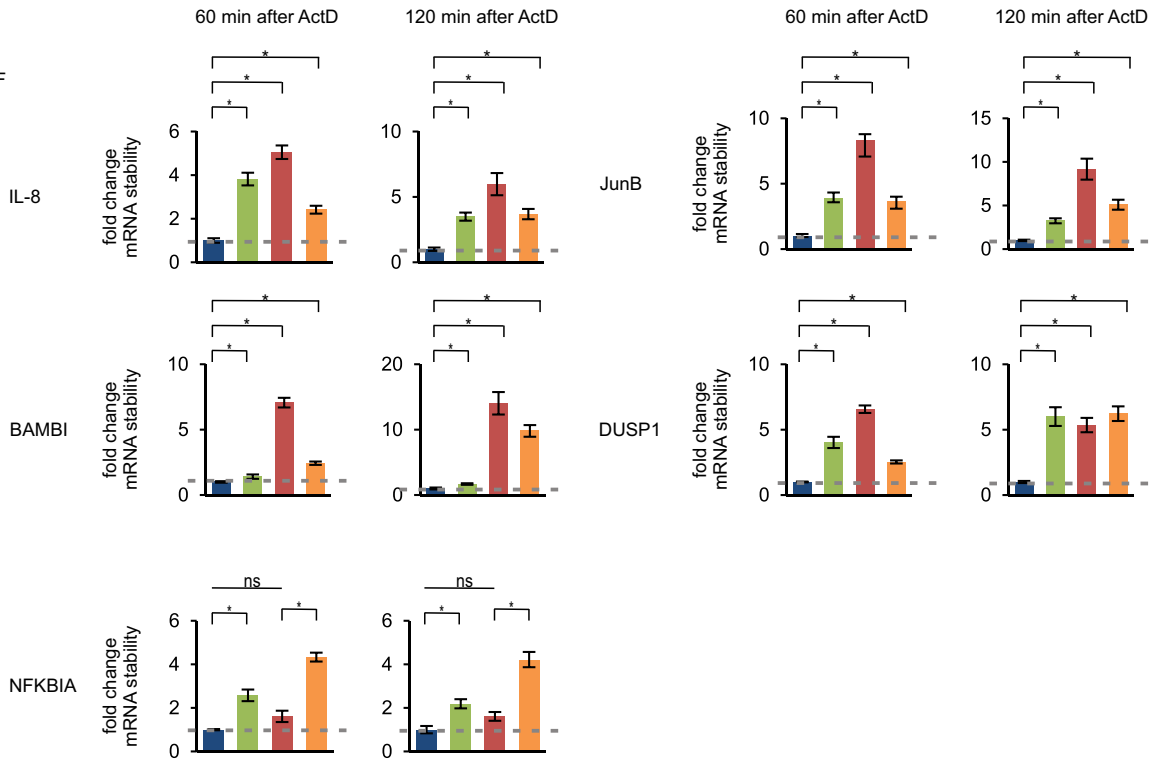**E**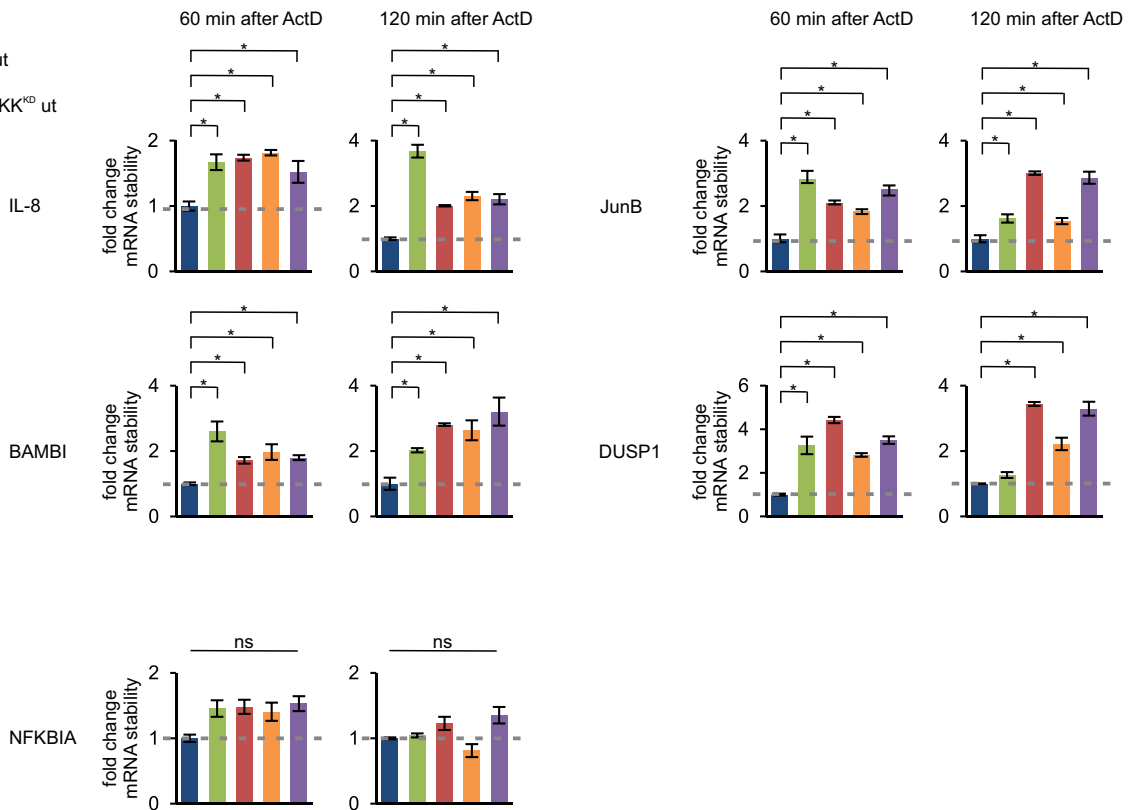

**A**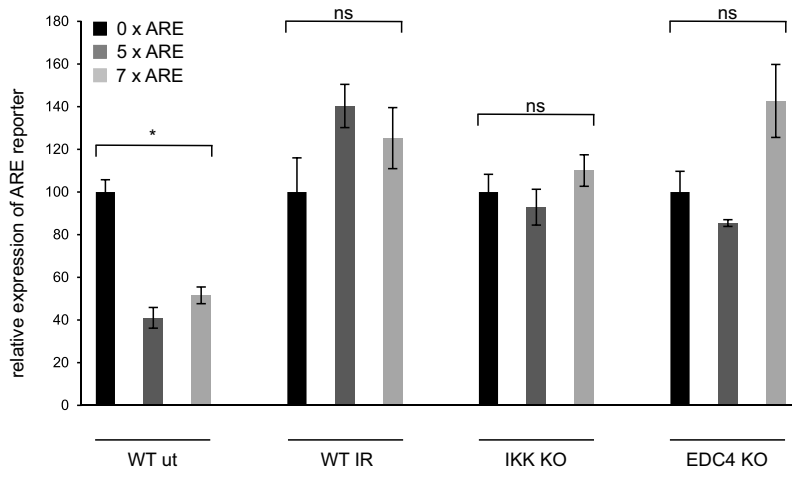

**B**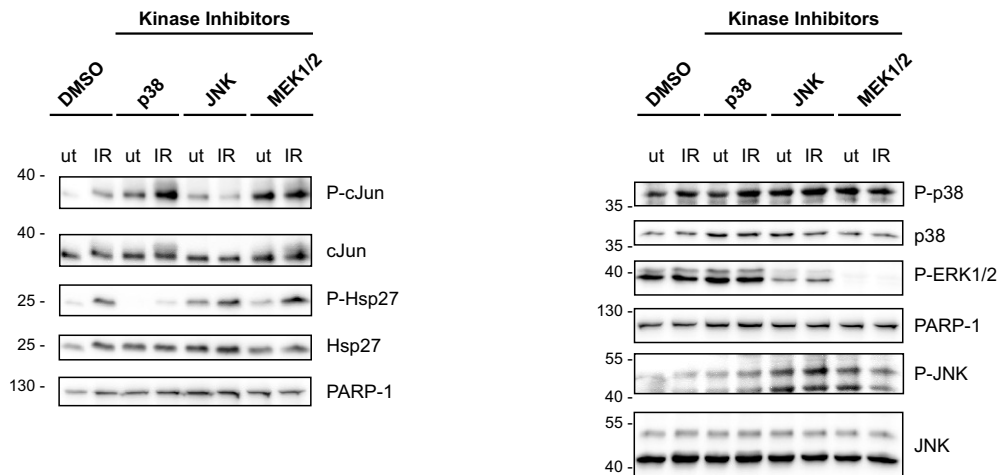**C**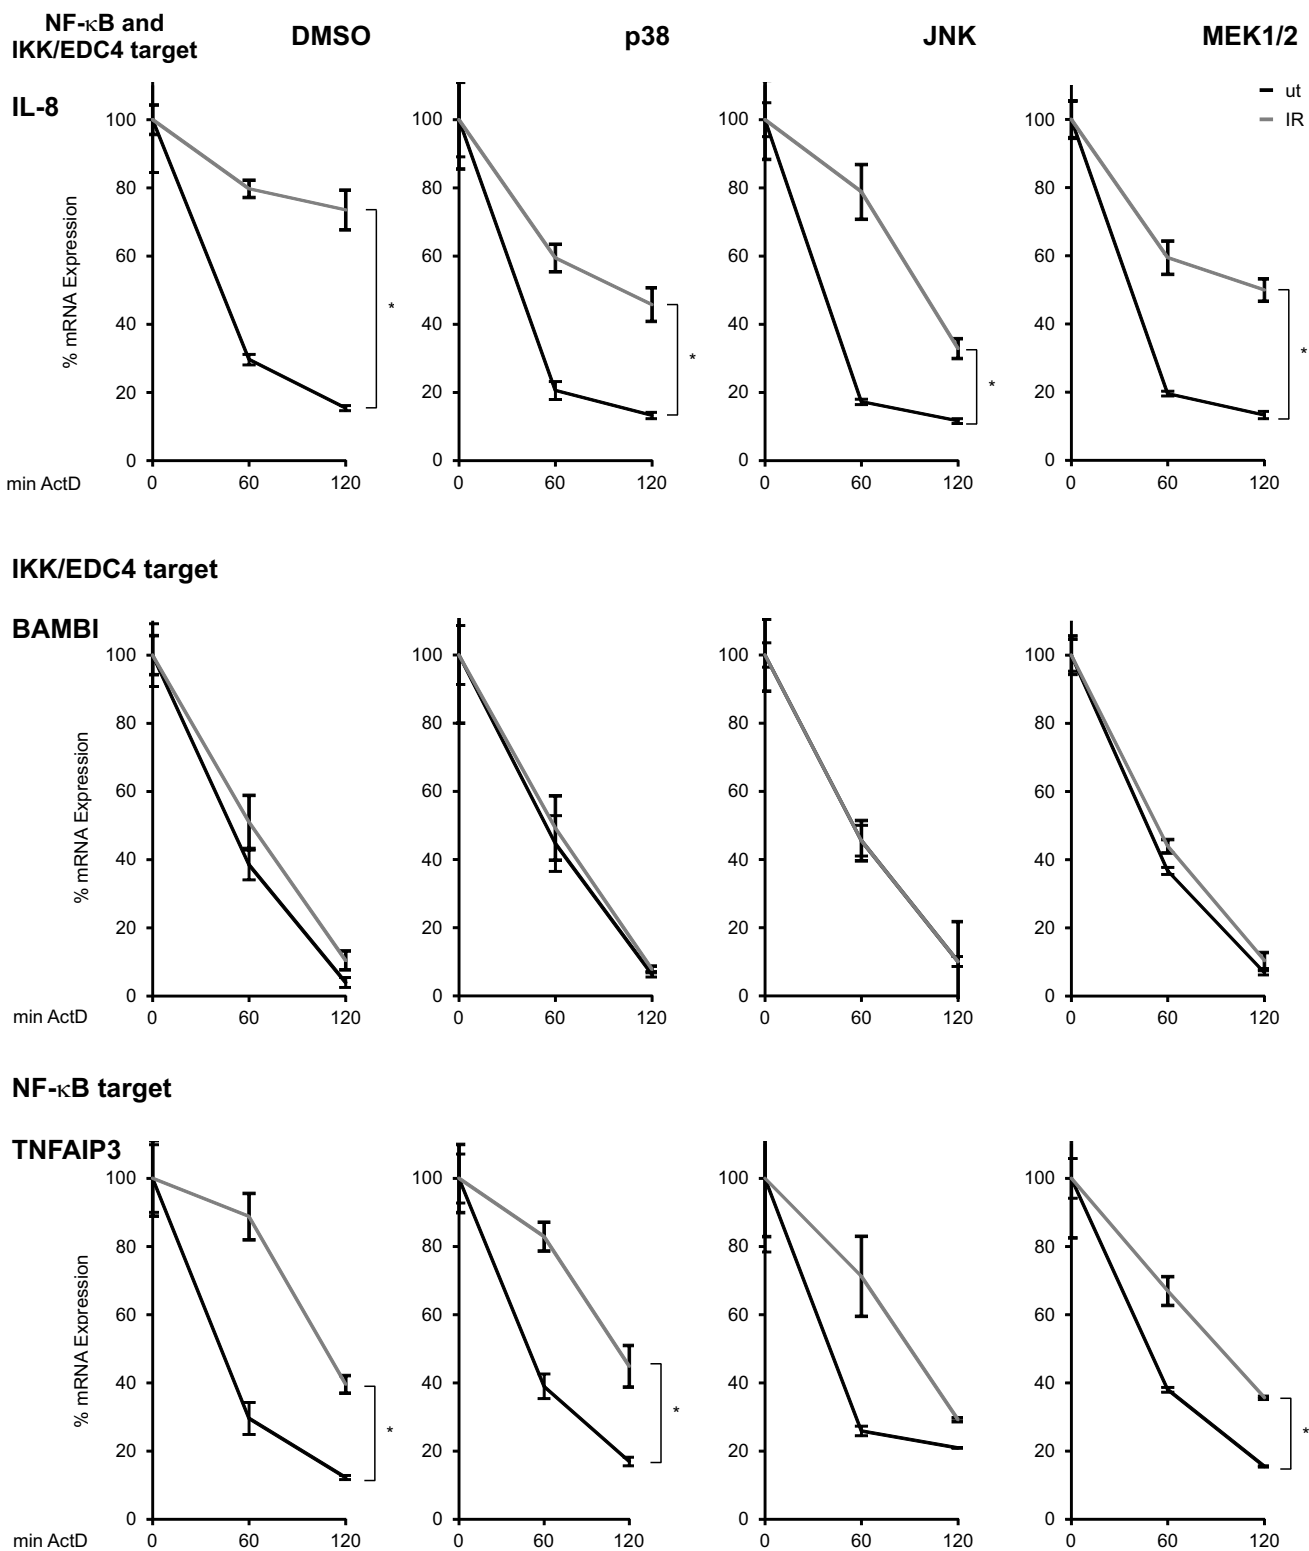

Supplement: EMBJ-37-e98658-s001.pdf [file EMBJ-37-e98658-s001.pdf]
