# Supplementary material
Source: PubMed Central journal article supplement (PMC6293339)

# Source Data Files

## Figure 1 b

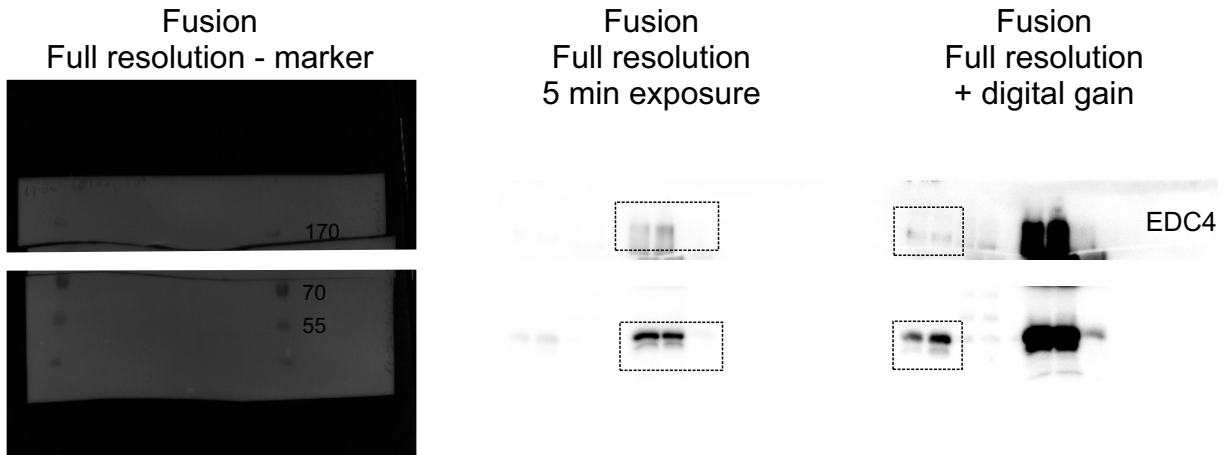

## Figure 1 c

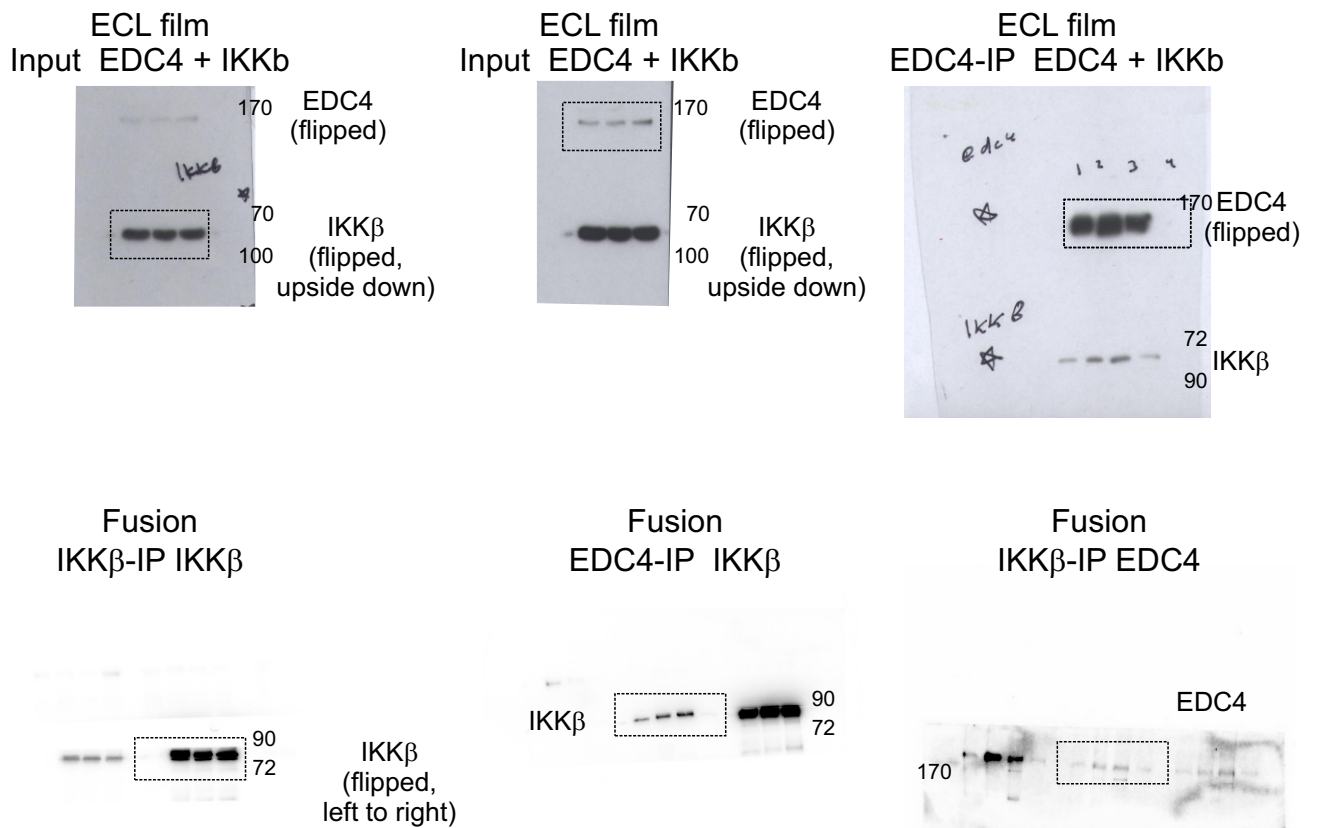

# Source Data Files

## Figure 1 e

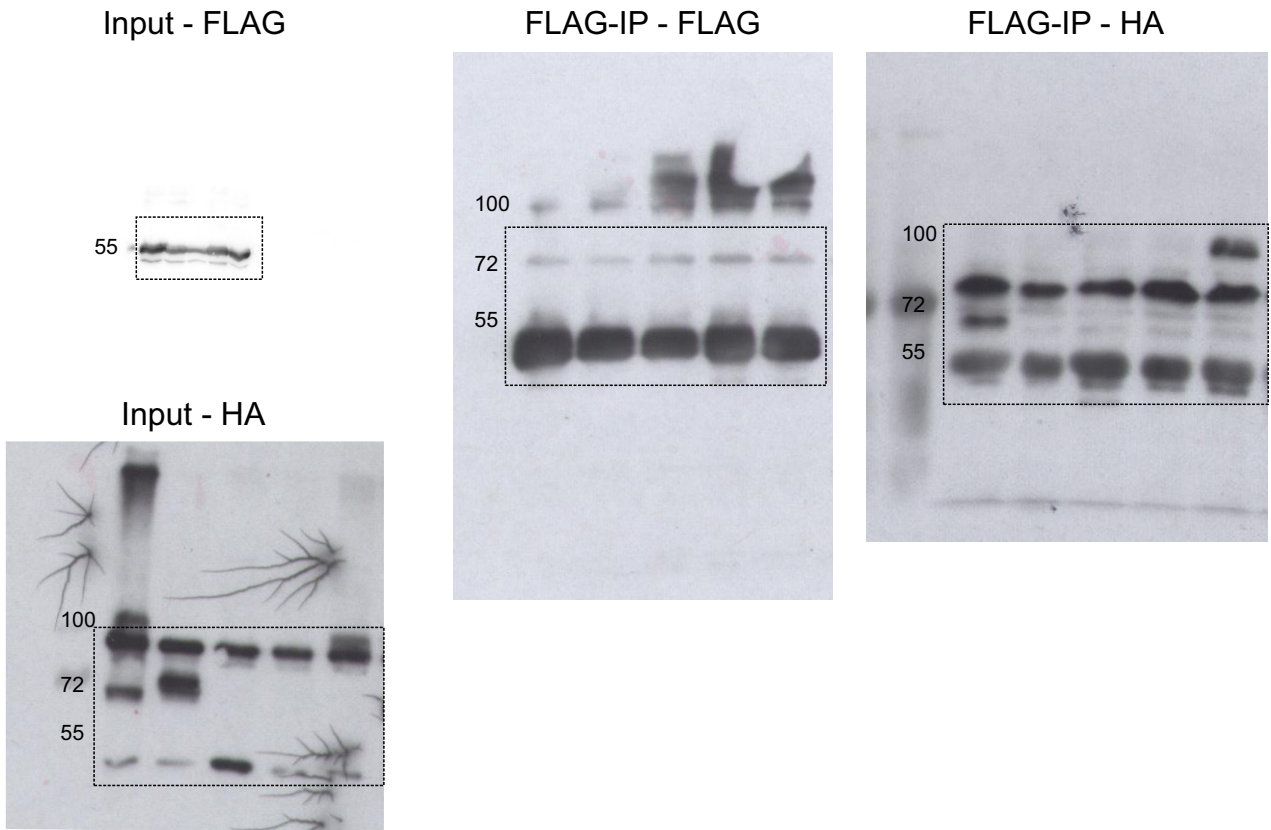

## Figure 1 f

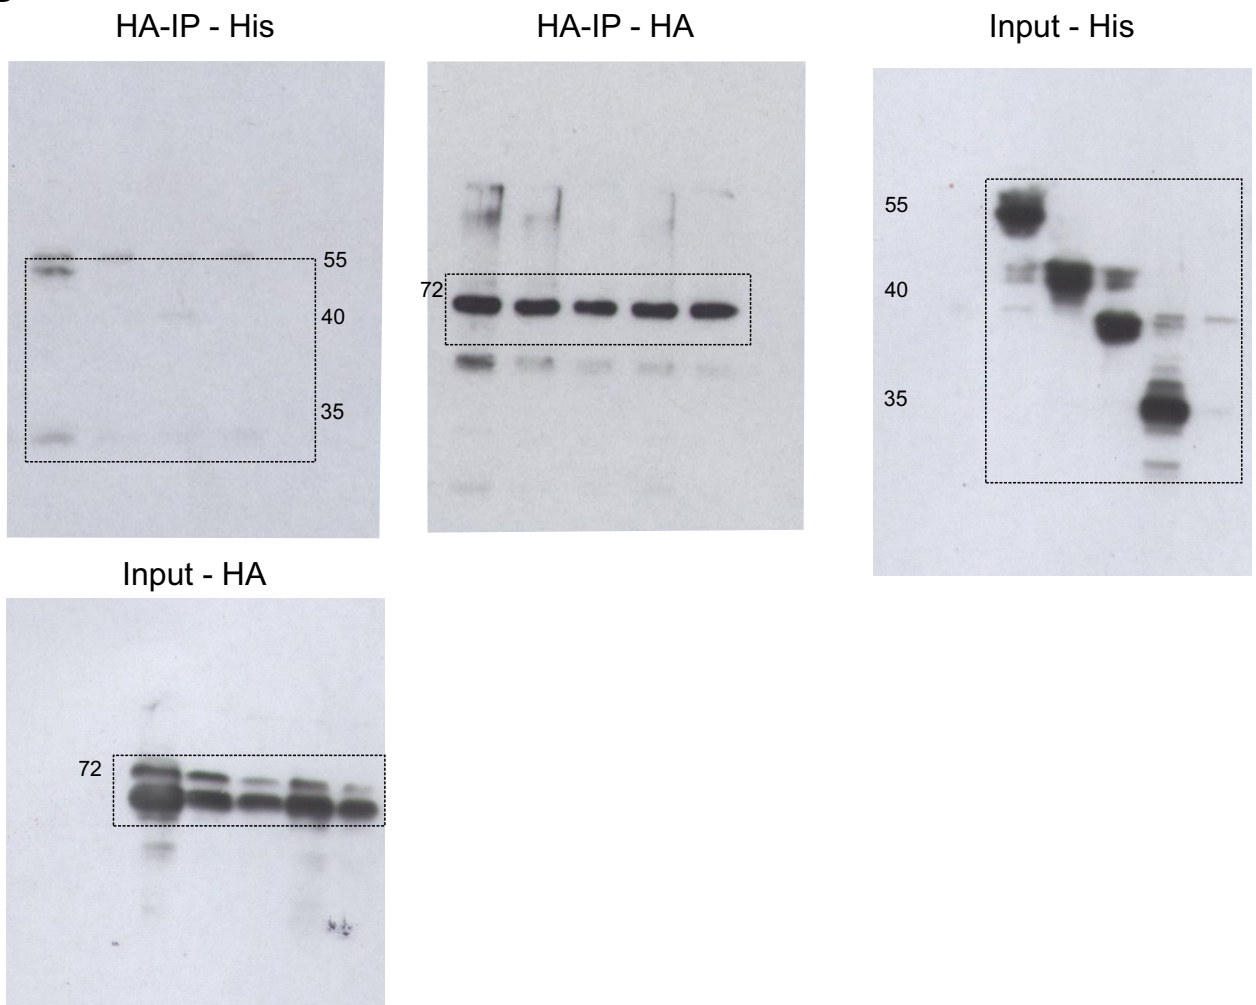

# Source Data Files

## Figure 1 g

HA-IP - FLAG

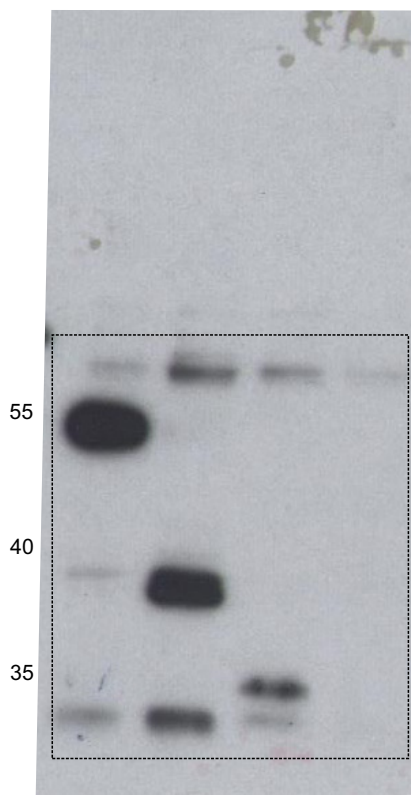

HA-IP - HA

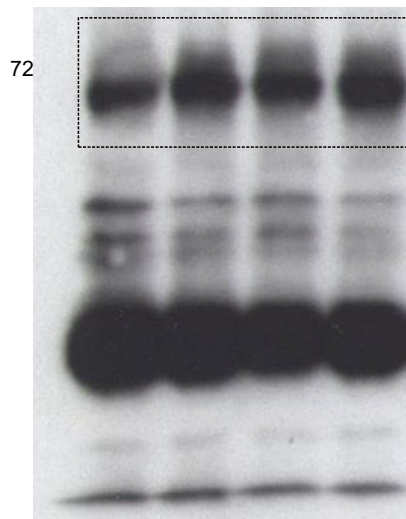

Input FLAG

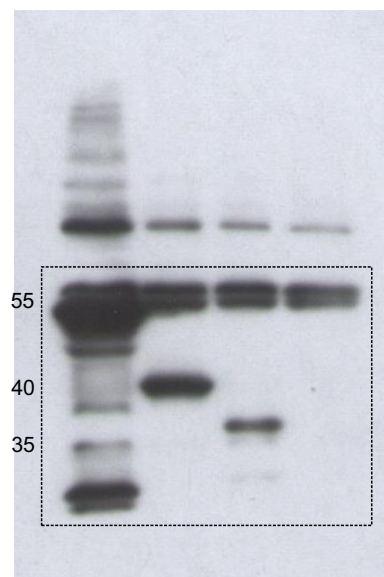

Input - HA

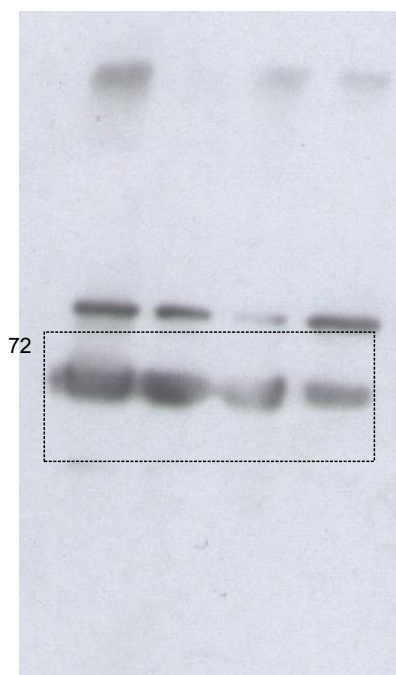

Supplement: EMBJ-37-e98658-s010.pdf [file EMBJ-37-e98658-s010.pdf]
