# Supplementary material
Source: PubMed Central journal article supplement (PMC6293339)

Source Data Files

Figure 2 a

Kinase Assay - Coomassie

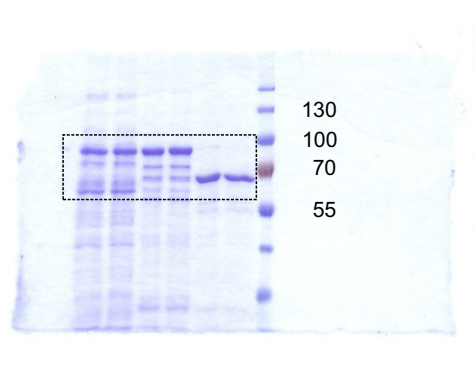

Kinase Assay

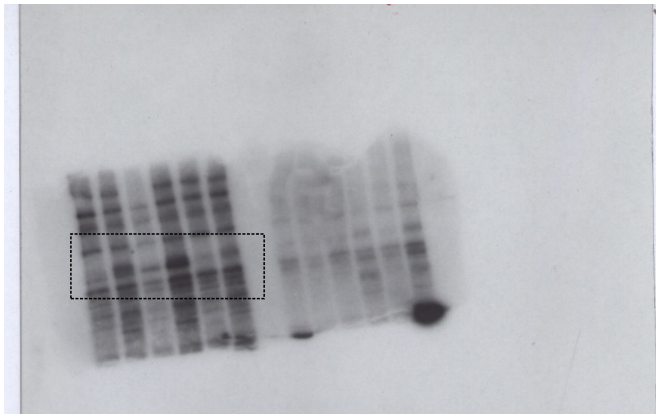

Kinase Assay

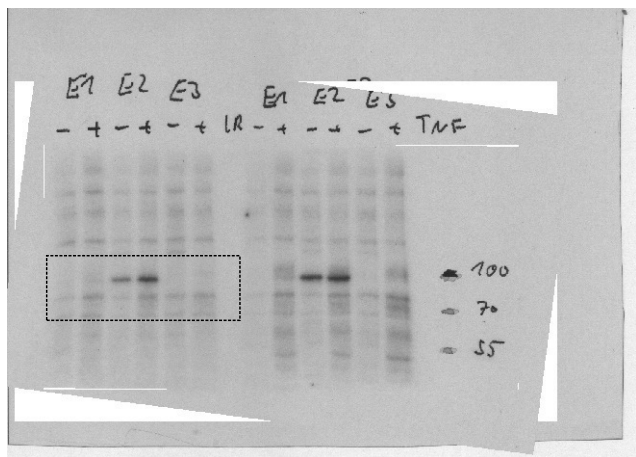

Figure 2 c

Kinase Assay

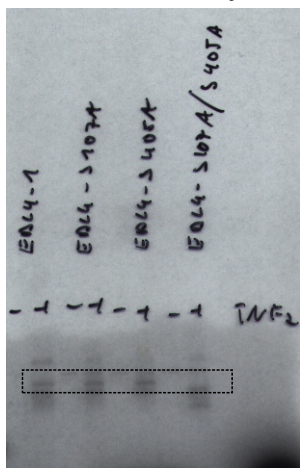

Kinase Assay - Coomassie

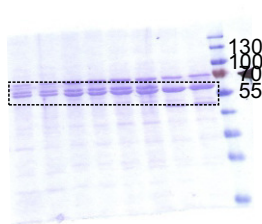

Supplement: EMBJ-37-e98658-s011.pdf [file EMBJ-37-e98658-s011.pdf]
