# Supplementary material
Source: PubMed Central journal article supplement (PMC6293339)

# Source Data Files

## Figure 3d

Fusion  
Input + IP - FLAG

Fusion  
Input + IP - FLAG

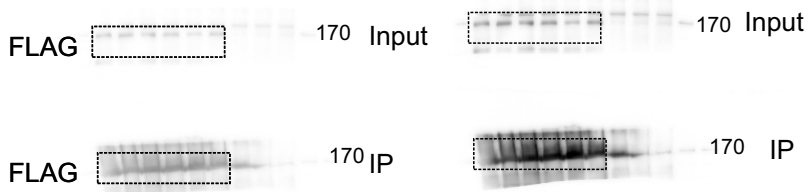

Fusion  
Input - DCP1a

Fusion  
Input - DCP2

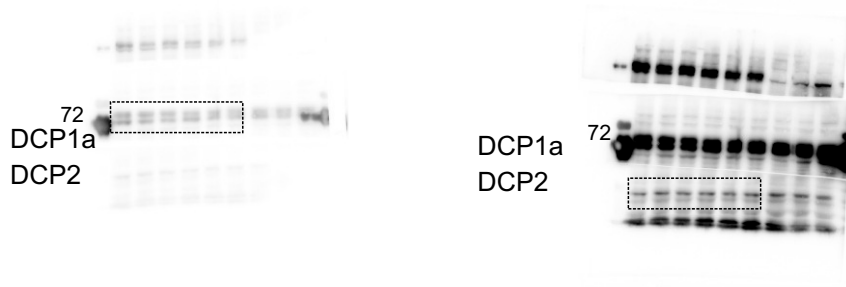

Fusion  
IP - marker

Fusion  
FLAG-IP - DCP1a, DCP2

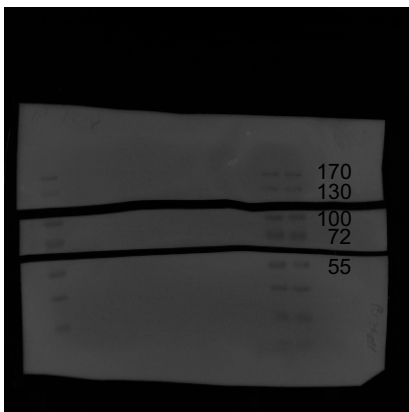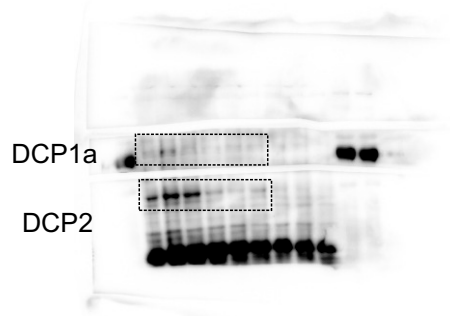

Supplement: EMBJ-37-e98658-s012.pdf [file EMBJ-37-e98658-s012.pdf]
